1 Title: Revisiting G3BP-S149 phosphorylation and its impact on stress granule assembly

2

3 Running Title: The G3BP1 S149E phosphomimetic does not regulate SG assembly

4

5 Marc D. Panas<sup>1,2</sup>, Nancy Kedersha<sup>1</sup>, Tim Schulte<sup>3</sup>, Rui M. Branca<sup>4</sup>, Pavel Ivanov<sup>1</sup> and Paul  
6 Anderson<sup>1</sup>

7

8

9 <sup>1</sup>Harvard Medical School and Brigham and Women's Hospital; Division of Rheumatology,  
10 Immunology and Allergy; 60 Fenwood Road, Boston, MA 02115

11 <sup>2</sup>Karolinska Institutet; Department of Microbiology, Tumor and Cell Biology; Nobels väg 16,  
12 Stockholm SE-171 77, Sweden

13 <sup>3</sup>Science for Life Laboratory, Department of Medicine Solna, Karolinska Institutet, Stockholm SE-  
14 171 77, Sweden

15 <sup>4</sup>Clinical Proteomics Mass Spectrometry, Department of Oncology-Pathology, Science For Life  
16 Laboratory and Karolinska Institutet, Stockholm, Sweden

17

18 \*Author for correspondence:

19 Paul Anderson, M.D, Ph.D.

20 Division of Rheumatology, Immunology and Allergy

21 Brigham and Women's Hospital

22 60 Fenwood Road

23 Boston, Massachusetts 02115

24 Tel: (617) 525-1212

25 Fax: (617) 525-1310

26 Email: [panderson@rics.bwh.harvard.edu](mailto:panderson@rics.bwh.harvard.edu)

27

28

29

30

31

32

33

34 **Abstract:**

35 Stress granules (SGs) are cytoplasmic, non-membranous RNA/protein structures that assemble  
36 in response to environmental stress. G3BP is a critical SG-nucleating protein, and its ability to  
37 regulate SGs has been reported to be regulated by serine 149 phosphorylation. We now report  
38 that the constructs engineered to contain non-phosphorylatable and phosphomimetic (G3BP1-  
39 S149A and G3BP1-S149E, respectively) mutations used in many studies include additional  
40 unintended mutations (A54T/S149A and S99P/S149E) one of which (S99P) is responsible for the  
41 effects on SG assembly attributed to S149E. Specifically, the S99P mutation alone reduces SG  
42 nucleation and impairs the ability to rescue SG assembly in  $\Delta\Delta$ G3BP1/2 U2OS KO cells,  
43 challenging the widely-stated conclusion that de-phosphorylation of serine 149 in G3BP1  
44 promotes SG assembly. We used comparative mass spectrometry analysis of both (1) ectopically  
45 expressed GFP-G3BP1 in  $\Delta\Delta$ G3BP1/2 U2OS KO and (2) endogenous G3BP1 in wild-type U2OS,  
46 with and without sodium arsenite treatment, in an attempt to reproduce earlier findings, but  
47 found no significant changes in S149 phosphorylation that correlate with arsenite-induced SG  
48 formation.

49  
50  
51  
52  
53  
54  
55  
56  
57  
58  
59  
60  
61  
62  
63  
64  
65

66 **Introduction:**

67 Sudden changes in environmental conditions, such as heat shock, oxidative stress, UV or viral  
68 infection, affect all cells, and can damage proteins, lipids and nucleic acids (Anderson and  
69 Kedersha, 2008; Buchan and Parker, 2009). Cells require protective programs to maintain  
70 viability in the face of changing environmental conditions, in part by reprogramming protein  
71 expression (Buchan and Parker, 2009), and by reducing expression of housekeeping proteins to  
72 enhance production of pro-survival proteins (Kedersha and Anderson, 2002). Stressed cells  
73 inhibit translation initiation, thus increasing the amount of stalled 48S preinitiation complexes  
74 (PICs) (Panas et al., 2016) released from polysomes. These PICs condense to form non-  
75 membrane-enclosed foci known as stress granules (SGs) (Kedersha et al., 2000). Core  
76 components of SGs are 48S PICs and mRNA, but they also enriched for a large number of RNA-  
77 binding proteins that promote SG condensation, such as TIA1/R, FMRP/FXR1, Caprin1 and G3BP.  
78 In addition to these RNA-binding proteins, an eclectic collection of signaling molecules are  
79 recruited into SGs, including RACK1, PKC $\alpha$ , USP10, and TRAF2 (Kedersha et al., 2013).

80

81 SGs are dynamic structures into which protein contents rapidly shuttle in and out, although SGs  
82 themselves can persist for hours (Kedersha et al., 2000). This property and the lack of a limiting  
83 membrane have led to the proposal that SG formation is mediated by a liquid/liquid phase  
84 transition (Han et al., 2012; Kato et al., 2012; Weber and Brangwynne, 2012) by which stalled  
85 PICs are condensed into visible subcellular regions by the activity of protein aggregases  
86 (Kedersha and Anderson, 2007; Kedersha et al., 2016; Reineke et al., 2015). The threshold for SG  
87 formation is determined by two general events: the bulk amount of stalled PICs released from  
88 polysomes, and the local concentration/aggregation of SG-nucleating proteins. Stalled PIC levels  
89 are regulated by stress-activated eukaryotic initiation factor (eIF)2 $\alpha$  kinases, reducing available  
90 ternary complexes and resulting in stalled 48S PICs (Kedersha et al., 2002; Kedersha et al., 1999).  
91 Polysome disassembly resulting in SG formation is also caused by drugs such as pateamine A  
92 (Bordeleau et al., 2006a; Dang et al., 2006) or hippuristanol (Bordeleau et al., 2006b; Tsumuraya  
93 et al., 2011), compounds that target the eIF4F complex, which leads to stalled 48S PICs and thus  
94 triggers SG formation.

95

96 Ectopic expression of SG-nucleating proteins, such as TIA1 or G3BP, induces the formation of  
97 SGs even in the absence of drugs or stress (Kedersha and Anderson, 2007) by increasing the rate

98 at which available PICs are condensed into SGs. SG-nucleating proteins are rich in prion-like, low  
99 complexity (LC), and unstructured/intrinsically disordered (ID) protein regions (Uversky, 2017)  
100 that mediate protein aggregation (Tompa, 2005). The SG protein TIA1 contains a prion-like  
101 domain that can form insoluble aggregates (Gilks et al., 2004). The SG-nucleators G3BP1 and  
102 G3BP2 (hereafter referred to jointly as G3BP) lack a prion-like domain but contain extensive  
103 disordered regions, adjacent to an ordered NTF2-like dimerization domain (Tourriere et al.,  
104 2003) that is essential for SG assembly. The SG-inducing activity of G3BP is inhibited by  
105 interactions with other proteins such as USP10, which contains a short motif (FGDF) that binds  
106 the G3BP NTF2-like domain. The FGDF motif is also found in the viral non-structural protein nsP3  
107 of Semliki Forest virus that binds G3BP (Panas et al., 2015; Schulte et al., 2016). Overexpression  
108 of these FGDF-containing proteins blocks SG formation (Kedersha et al., 2016; Panas et al.,  
109 2015).

110

111 The NTF2-like domain mediates dimerization of G3BP1, which is reportedly regulated by  
112 phosphorylation of a site (Ser 149) located in a disordered acidic region adjacent to the NTF2  
113 domain (Tourriere et al., 2003). Serine 149 was described to be constitutively phosphorylated,  
114 and de-phosphorylated in response to sodium arsenite (SA) treatment, concurrent with SG  
115 formation. The authors proposed that constitutive phosphorylation of S149 prevents G3BP1  
116 dimerization and consequently inhibits SG formation; its stress-induced de-phosphorylation  
117 would then allow dimerization and promote SG formation. Evidence to support this model was  
118 obtained by using overexpressed non-phosphorylatable G3BP1 mutant S149A and  
119 phosphomimetic mutant S149E, which showed that S149A G3BP1 efficiently nucleated SGs  
120 while S149E failed to do so (Tourriere et al., 2003). A subsequent study from our lab using stably  
121 expressed S149A and S149E G3BP1 mutants in  $\Delta\Delta$ G3BP1/2 double knockout U2OS cells  
122 indicated that the S149E mutant is impaired in SG assembly (Kedersha et al., 2016).

123

124 Here we report that there are additional mutations in the original pEGFP-C1-G3BP1-S149A and  
125 S149E constructs (Tourriere et al., 2003) that were generously shared and widely disseminated.  
126 These constructs were used in our study (Kedersha et al., 2016) and many other studies (Barr et  
127 al., 2013; Jedrusik-Bode et al., 2013; Kedersha et al., 2016; Kwon et al., 2007; Sahoo et al., 2018;  
128 Sahoo et al., 2012; Szaflarski et al., 2016). We have now identified second mutations within the  
129 NTF2-like domains of the original constructs. Specifically, we identified an alanine to threonine



130 conversion at position 54 in the S149A (actually A54T/S149A) construct, and a serine to proline  
131 conversion at position 99 in the S149E construct (actually S99P/S149E). Whereas the single A54T  
132 mutation has no effect on SG assembly, the single S99P mutation destabilizes the protein,  
133 dominantly inhibits SG formation, and only partly rescues SG formation in G3BP1/2 KO cells.  
134 Transient transfections and immunoprecipitations reveal that G3BP1-S99P does interact with  
135 USP10 and Caprin1, but exhibits impaired dimerization. It is less efficiently expressed owing its  
136 ubiquitination and instability, and co-aggregates with the autophagy adaptor protein  
137 sequestosome 1 *in vivo*. Mapping of the S99P mutations to available crystal structures supports  
138 the observed impairment of dimerization. Mass spectrometry (MS) analysis of S149  
139 phosphorylation in untreated versus SA treated cells reveals no significant differences, indicating  
140 that S149 phosphorylation does not correlate with SG formation. Finally, repaired S149A and  
141 S149E constructs lacking these additional mutations behave indistinguishably from wt G3BP1 in  
142 their ability to mediate SG assembly.

143

144 These data show that the impaired ability of the original pEGFP-C1-G3BP1-S149E construct to  
145 nucleate or rescue SGs is caused by the accidental S99P mutation, rather than the intentional  
146 S149E mutation. This finding impacts other reports that used these plasmids to investigate the  
147 functional effects of S149 phosphorylation of G3BP1.

148

149 **Results:**

150 **G3BP1-S149E contains a second S99P mutation localized within NTF2-like domain of G3BP1**

151 We set out to examine how S149 in the acidic region could regulate presumed NTF2-like  
152 domain dimer formation, using a 1-168 fragment of G3BP1 previously described (Kedersha et al.,  
153 2016). After re-cloning G3BP1-168-wt, G3BP1-168-S149A and G3BP1-168-S149E into bacterial  
154 expression vectors, we encountered unexpected issues when purifying His-tagged G3BP1-168-  
155 S149E (Fig. S1A). While both wild-type and the S149A mutant migrated as soluble proteins with  
156 defined peaks in size exclusion chromatography (SEC), the S149E protein appeared as a major  
157 peak in the void volume, but not at the expected molecular weight (Fig. S1A). Therefore, we  
158 checked the sequences of the bacterial expression plasmids and discovered secondary  
159 mutations of Ala-54 to Thr (A54T) and Ser-99 to Pro (S99P) in the G3BP1-S149A and G3BP1-  
160 S149E mutants, respectively. We then identified these same mutations in the original stocks of  
161 pEGFP-C1-G3BP1-S149A and S149E (Tourriere et al., 2003) that we had obtained in 2004. We  
162 then requested and received a second batch of plasmids (in 2016), and confirmed that both sets  
163 of plasmids harbored the same secondary mutations. The mutant constructs are diagramed in  
164 Fig. 1A.

165 Structural analysis of the crystal structure reveals that Ala-54 is localized in a loop region  
166 preceding the  $\alpha$ III helix, in hydrophobic contact with Tyr-56 and Val-41. While its substitution to  
167 Thr most probably has only minor effects, its close proximity to His-83 of the neighboring chain  
168 could affect G3BP1 dimerization (Fig. 1C), possibly explaining the observed altered mobility of  
169 the A54T/S149E mutation relative to wt G3BP1 in size exclusion chromatography (Fig. S1A). In  
170 contrast, Ser-99 is localized at the end of strand  $\beta$ III, embedded in a  $\beta$ -sheet-mediated hydrogen  
171 bond pattern with His-74 of strand  $\beta$ II, and its side chain hydroxyl-group is fixed by another  
172 hydrogen bond to the carbonyl backbone of Gln-103. Substitution of Ser-99 to Proline has major  
173 consequences, as it disrupts the hydrogen-bond pattern, and also rigidifies the peptide  
174 backbone (Fig. 1C). An *in silico* substitution of Ser-99 to proline renders the formerly favored Phi  
175 and Psi angles of the Ser-99 backbone (Fig. S1B, panel 1, green arrows) into disallowed regions  
176 of the proline backbone in Ramachandran plots (Fig. S1B, panel 4, red arrows). In addition, we  
177 used the RosettaBackrub server to predict residues that are tolerated at these positions, and to  
178 model structures of the A54T and S99P mutants (Davis et al., 2006; Davis et al., 2007; Lauck et  
179 al., 2010; Smith and Kortemme, 2011). While both wild-type residues are highly favored (A54  
180 and S99) at their respective positions, Pro-99 is less favorable as compared to Thr-54 (Fig. S1C,

181 red boxes). The modelled structures of the S99P mutant exhibit a significant conformational  
182 adjustment of more than 2.5Å of the associated loop region, while the modeled structures of  
183 the A54T mutant are almost identical in their backbone conformation adjustment of 0.2 Å as  
184 compared to the wild-type structure (Fig. S1D). Thus, we conclude that the S99P mutation was  
185 the main cause of our failed protein purification attempt for the presumed S149E variant. We  
186 then hypothesized that the same S99P mutation may account for *in vivo* phenotypes ascribed to  
187 S149E, as the “S149E” construct was really the double mutant S99P/S149E. To test this  
188 hypothesis, we ascertained the effects of each single mutation on SG formation, and also  
189 revisited the phosphorylation state of G3BP-S149 during stress using mass spectrometry (MS).

190

### 191 **S99P disrupts SG condensation while S149E does not**

192 We transfected U2OS-wt cells with the indicated constructs and assessed SG formation  
193 with/without sodium arsenite (SA) treatment (Fig. 1D, 1E). We counterstained the transfected  
194 cells for SG markers TIA1 and eIF4G1, to confirm bona fide SG formation (Fig. 1E). Cells  
195 transfected with GFP-tagged G3BP1-wt, A54T, S149A, S149E, and A54T-S149A displayed  
196 comparable rates of SG formation, but cells transfected with S99P and S99P-S149E exhibited  
197 fewer SGs than the other forms of G3BP1 and fewer than the GFP only control (Fig. 1D, 1E),  
198 consistent with the results obtained in COS7 cells reported earlier (Tourriere et al., 2003). In  
199 cells treated with SA, all GFP-G3BP1 variants are recruited to SGs. G3BP1 variants containing the  
200 S99P mutation significantly repress both spontaneous and SA-induced SGs (Fig. 1D, E), in partial  
201 agreement with the original study, which showed that G3BP1-(S99P)-S149E inhibited  
202 spontaneous but not SA-induced SGs.

203 We next assessed the extent to which the various forms of G3BP1 can rescue SGs in  
204  $\Delta\Delta$ G3BP1/2 U2OS cells, which lack endogenous G3BP1 and G3BP2 proteins and are unable to  
205 form SGs in response to most stresses. SG competence is rescued by reconstituting these cells  
206 with exogenously-expressed G3BP1, either transiently or stably (Kedersha et al., 2016).  
207 Transient transfection of  $\Delta\Delta$ G3BP1/2 U2OS cells reveals that G3BP1-wt, A54T, S149E and A54T-  
208 S149A all rescue the formation of SGs to comparable levels (Fig. 2A and B). A very modest  
209 increase in SG nucleation without stress was observed upon transfection with the S149A mutant  
210 (Fig. 2B, \* columns). However, variants bearing the S99P mutation were significantly impaired in  
211 their ability to nucleate (without stress) or rescue (with stress) SG formation (Fig. 2A, quantified  
212 in 2B, \*\* columns). In addition to SA, other stresses (clotrimazole and pateamine A) gave similar

213 results (Fig. S2). Constructs bearing the S99P mutation were significantly less effective at  
214 rescuing SGs under all stress conditions (Fig. 2B, \*\* columns).

215

### 216 **Increased proteolysis of G3BP1-S99P impairs SG formation**

217 The reduced ability of S99P constructs to rescue SGs could be due to lower expression  
218 levels. To assess this, we transiently transfected G3BP1 constructs into  $\Delta\Delta$ G3BP1/2 U2OS and  
219 quantified the protein levels using western blotting. Consistently, the constructs harboring the  
220 S99P mutation showed reduced protein expression relative to G3BP1-wt and the other mutants  
221 (Fig. 2C, 2D). A longer exposure revealed that the S99P containing constructs were missing a 49  
222 kDa band and displayed different lower molecular weight species (Fig. 2C, 2D). This is consistent  
223 with earlier data (Kedersha et al., 2016), which showed lowered expression/altered breakdown  
224 products with the original S149E mutant and a shorter piece containing the NTF2-like domain,  
225 both of which we now realize contained the additional S99P mutation.

226 We previously noticed that the S99P/S149E construct expressed poorly relative to the  
227 other G3BP1 variants in COS7 cells, the same cells used in the original study (Tourriere et al.,  
228 2003). To validate our U2OS findings (Fig. 1D, 1E and 2A, 2B), we then transfected COS7 cells  
229 with GFP-tagged versions of wt, S149E, S99P, and the original double mutant S99P/S149E G3BP1  
230 (Fig. 3), and stained for the SG marker eIF3b (blue) and for sequestosome-1 (Fig. 3A-D, red), a  
231 protein adaptor that binds poly-ubiquitinated proteins and forms cellular aggregates that  
232 promote autophagic clearance (Bjørkøy et al., 2005; Pankiv et al., 2007). SGs nucleated by  
233 G3BP1-wt or S149E are positive for eIF3b and do not contain sequestosome-1 (Fig. 3A, 3B), as  
234 expected. However, SGs nucleated by G3BP1-S99P or S99P/S149E display eIF3b-positive SGs  
235 containing subregions positive for sequestosome-1 (Fig. 3C, 3D, red arrows). To determine  
236 whether the S99P constructs were less efficiently translated, we co-transfected a neutral  
237 reporter and quantified proteins via western blotting. G3BP1 levels were normalized to reporter,  
238 and the mutants plotted relative to the normalized G3BP1-wt. The expression of the S99P  
239 variant was significantly reduced relative to WT (Fig. 3E, Fig. S3A). A short (6h) treatment with  
240 the proteasome inhibitor MG132 modestly increased its expression, but this was not significant  
241 (Fig. S3A). GFP-immunoprecipitation confirmed elevated ubiquitination in the S99P constructs  
242 (Fig. 3F). Taken together, the data indicate that S99P is unstable, ubiquitinated, and degraded  
243 (possibly in part through sequestosome-targeted autophagy), but GFP-G3BP1-S99P expression  
244 does not reduce global translation levels or transfection efficiency, as shown by the co-

245 transfected reporter. Reduced expression may in part explain the reduced ability of G3BP1-S99P  
246 to rescue SGs (Fig. 2A, 2B) in cells lacking endogenous G3BP, but it does not explain its apparent  
247 dominant-negative effects on SGs in cells that express endogenous G3BP (Fig. 1D).

248 Another property ascribed to the G3BP1-S149E phosphomimetic is increased  
249 interaction with co-expressed FLAG-Disheveled-2 (Sahoo et al., 2012); this study used the  
250 original S149E plasmid. To replicate these findings and ascertain whether they were due to the  
251 S149E or to the S99P mutation, we co-transfected our single-mutant constructs with Flag-tagged  
252 Disheveled-2 in COS7 cells, and assessed colocalization of the proteins (Fig. S3B). The results  
253 show that DVL2 only associates with G3BP1-S99P, not with G3BP1-wt or G3BP1-S149E (Fig. S3B).  
254 Remarkably, both our data and that in (Sahoo et al., 2012) show that the DVL2:G3BP1  
255 localization is not perfectly coincident, but shows that DVL2 forms a shell around G3BP1-S99P,  
256 segregating it from the SG marker eIF3 (Fig. S3B). While the significance of this is not clear, the  
257 data suggest that the S99P mutation likely was responsible for the effects attributed to S149E.

258 What does the serendipitous S99P mutation tell us about G3BP-mediated SG  
259 condensation? As shown in the crystal structure (Fig. 1B) and the Ramachandran plots (Fig. S1B),  
260 the substitution of Ser-99 to a proline rigidifies the peptide backbone, which destabilizes the  
261 protein and renders G3BP1 sensitive to degradation in U2OS and COS7 cells. This could affect  
262 the ability of G3BP1 to form dimers, or to interact with proteins that normally bind to the NTF2-  
263 like domain. To distinguish between these possibilities, we first assessed effects of the S99P  
264 mutation on G3BP1 interaction with its two major partners, USP10 and Caprin1 (Kedersha et al.,  
265 2016; Panas et al., 2015; Solomon et al., 2007). GFP immunoprecipitations revealed that USP10  
266 and Caprin1 are both co-immunoprecipitated by G3BP1 constructs containing the S99P mutation  
267 (Fig. 3G, 3H), suggesting that the USP10 and Caprin1 binding sites on G3BP are unaffected by the  
268 S99P mutation. To assess dimerization, we co-transfected  $\Delta\Delta$ G3BP1/2 U2OS cells with various  
269 combinations of constructs expressing GFP-G3BP1-wt/S99P and Flag-G3BP1-wt/S99P. Using  
270 equal amounts of constructs, G3BP1-S99P proteins were expressed in lower levels compared to  
271 G3BP1-wt, as shown by western blot on whole cell lysates (Fig. 3I). IPs via the GFP-tag  
272 immunoprecipitated G3BP1-wt and G3BP1-S99P proteins equally well, but the lower expression  
273 of the S99P resulted in less material. As shown in Fig. 3J (quantification of 3I, left panel), the  
274 relative amounts of G3BP1-S99P to G3BP1-wt were comparable between lysates and GFP-IPs.  
275 However, proportionally less co-IPed Flag-tagged protein was detected with G3BP1-S99P

276 present (Fig. 3K, quantification of data in Fig 3I, right panel), suggesting that G3BP1-S99P protein  
277 is impaired in interacting with G3BP1-wt protein and with itself.

278

### 279 **S149 is not de-phosphorylated upon arsenite treatment**

280 Thus far, all data suggest that the S99P mutations account for the phenotype  
281 attributed to S149E, but the phosphorylation status of S149 during SG formation remains  
282 unclear. We first addressed this issue using a commercial phospho-specific antibody to the S149  
283 site from Sigma (G8046), but found that the antibody reacted with non-phospho GFP-G3BP-  
284 S149A in G3BP1 KO cells (Fig. S3C). We then employed an IP/MS approach, in which we IP'd  
285 endogenous G3BP1 from untreated or arsenite-treated U2OS cells, then used MS to assess the  
286 phosphorylation status of two reported sites, G3BP1-S149 and G3BP1-S232 (Fig. 4A, n=4). We  
287 also examined the phosphorylation of GFP-G3BP1 stably expressed in  $\Delta\Delta$ G3BP1/2 U2OS cells  
288 and precipitated using anti-GFP (Fig. 4B, n=6). In contrast to the original data which was  
289 obtained using CCL-39 cells (ras-transformed hamster lung fibroblasts, (Tourriere et al., 2003),  
290 we do not see a SA-induced decrease in phosphorylation at S149 in U2OS cells. On the contrary,  
291 we observe a modest but a statistically insignificant increase in S149 phosphorylation. We note  
292 that analysis of this region is particularly challenging by LCMS (Liquid Chromatography Mass  
293 Spectrometry) proteomics because of the high density of acidic residues (D and E) in the vicinity  
294 of the S149 phospho-site (YQDEVFGGFVTEPQEES#EEEEVEEPEER), which confers a decreased  
295 ionization efficiency at the ElectroSpray Ionization (ESI) source, which results in poor recovery  
296 relative to other peptides analyzed by MS. To recover this peptide, we used large amounts of  
297 starting material. We attempted to assess the phosphorylation of the homologous serine in  
298 G3BP2, but failed to recover any S149 peptides, as this protein contains an even higher density  
299 of acidic residues, presumably the cause of the unreliably low recovery of the phosphopeptide  
300 by liquid chromatography/MS. We also assessed the phosphorylation of another site (S232)  
301 previously reported to be unaffected by stress (Tourriere et al., 2003), and confirm that we see  
302 no SA-induced phosphorylation changes at this site, in agreement with their findings.

303

304

305

306 **Discussion:**

307 G3BP is essential for SG assembly; cells lacking both G3BP1 and G3BP2 cannot assemble SGs  
308 when challenged with all known p-eIF2 $\alpha$  dependent and some p-eIF2 $\alpha$  independent stresses  
309 (Kedersha et al., 2016). The ability of G3BP1 to form SGs was reported to be regulated by the  
310 phosphorylation state of serine 149, such that de-phosphorylation of this amino acid promotes  
311 SG formation (Tourriere et al., 2003). In an attempt to study this posttranslational modification  
312 in more detail, we discovered additional mutations in the original constructs that were  
313 generously shared and widely distributed within the field. Specifically, we found that the pEGFP-  
314 C1-G3BP1-S149A (non-phosphorylatable) construct contains an additional alanine to threonine  
315 conversion at position 54, while the pEGFP-C1-G3BP1-S149E (phosphomimetic) construct  
316 contains an additional serine to proline mutation at position 99 (Fig. 1A). While we had originally  
317 sequenced the plasmids in 2004 to confirm the existence of the expected mutations at the S149  
318 site, we did not sequence the entire coding region.

319

320 We created repaired constructs to contain only single mutations, then assessed their ability to  
321 nucleate SGs upon transient overexpression in U2OS cells, and for their ability to rescue SGs in  
322  $\Delta\Delta$ G3BP1/2 U2OS KO cells. Our data (Fig. 1, 2 and S2) show that constructs containing only  
323 S149A or S149E displayed no statistical difference in their ability to nucleate or rescue SGs, in  
324 contrast to published data (Kedersha et al., 2016; Tourriere et al., 2003). Moreover, we were  
325 unable to detect any significant SA-induced changes in the phosphorylation status of the S149  
326 site in endogenous immunoprecipitated G3BP1 (Fig. 4A), or in GFP-G3BP1 stably expressed in  
327  $\Delta\Delta$ G3BP1/2 U2OS (Fig. 4B). Our data show that the S99P mutation is the sole cause of the  
328 previously described phenotype of impaired SG formation and SG rescue, and do not support  
329 the idea that phosphorylation of S149 promotes SG formation.

330

331 We mapped the exact positions of the unintentional mutations A54T and S99P in the publically  
332 available crystal structure (Schulte et al., 2016) (PDB: 5FW5) of the NTF2-like domain of G3BP1.  
333 The S99P change disrupts three hydrogen bonds within the  $\beta$ -sheet and a sheet-associated loop  
334 region (Fig. 1C), but also rigidifies the peptide backbone due to the structure of proline (Fig.  
335 S1B). These changes destabilize the protein to an extent that let us fail to purify the bacterially-  
336 expressed mutant protein (Fig. S1A), but more importantly render G3BP1 more sensitive to  
337 degradation when expressed in cells (Fig. 2C, 2D, Fig. 3). This is supported by *in vivo* data



338 showing that G3BP1-S99P is less efficiently expressed (Fig. 2C, 2D, 3G, 3I), ubiquitinated (Fig.  
339 3F), and differently processed (Fig. 2C, 2D) relative to G3BP1-wt.

340

341 While S99P destabilizes G3BP1, it does not prevent interactions with USP10 or Caprin1 (Fig. 3G,  
342 3H), which bind the NTF2-like domain and regulate SG formation *in vivo*. However, S99P  
343 mutations reduce dimer formation as shown by the reduced interaction of G3BP1-S99P with  
344 G3BP-wt, and the drastically reduced interaction of G3BP1-S99P with itself (Fig. 3I, 3J, 3K). As  
345 dimerization of G3BP is likely required for SG assembly, the failure of S99P mutants to interact  
346 with each other combined with their lower expression levels and ubiquitination satisfactorily  
347 explain why cells expressing G3BP1-S99P are impaired in SG assembly, and why S99P  
348 overexpression has a dominant-negative effect on SGs *in vivo*. In contrast, the single A54T  
349 mutation has only minor effects on protein expression levels, as this conserved mutation  
350 exchanges similar amino acids at a site that is located in an unstructured loop. As shown in Fig.  
351 3G, the A54T expression levels are similar to wt-G3BP expression levels and the interactions  
352 with USP10 and Caprin1 are not impaired.

353

354 Finally, we used MS to quantify the phosphorylation status of S149 and S232 in untreated and  
355 SA treated  $\Delta\Delta$ G3BP1/2 U2OS cells stably expressing GFP-G3BP1-wt. Previously reported findings  
356 indicating that SA treatment reduces S149 phosphorylation (Reineke et al., 2017; Tourriere et  
357 al., 2003), are not reproduced in our system. In six biological replicates, we detected no  
358 significant difference in S149 or S232 phosphorylation in response to SA treatment (Fig. 4A, 4B).  
359 Moreover, MS analysis of phosphorylation of S149 and S232 of endogenous G3BP1 (Fig. 4A), and  
360 GFP-tagged stably expressed G3BP1 (Fig 4B), showed a modest but not significant increase upon  
361 SA treatment, suggesting that S149 phosphorylation does not influence G3BP's ability to  
362 nucleate or to rescue SGs. Technical differences in the experimental setup (cell lines, antibodies)  
363 may contribute to the conflicting results, but it is important to note that the statistical  
364 significance of stress-induced reduced phosphorylation was not determined (Reineke et al.,  
365 2017; Tourriere et al., 2003).

366

367 Our findings may impact the interpretation of other studies which utilized the original pEGFP-  
368 C1-G3BP1-S149A and S149E constructs. The deacetylase HDAC6 interacts with G3BP *in vivo* and  
369 *in vitro*. Reduced binding of the S149E mutant suggested that phosphorylation modulates the



370 HDAC6:G3BP interaction (Kwon et al., 2007), which was mapped to G3BP1 fragments containing  
371 the S149 site (the acidic region) but lacking the NTF2-like domain, hence it is possible that S149  
372 regulates interactions with HDAC6 but not SG formation. It is notable, however, that HDAC6 has  
373 not been identified as a SG component in two major studies using proximity labeling to catalog  
374 SG components (Markmiller et al., 2018; Youn et al., 2018). Another study reported that S149E  
375 specifically interacts with Dvl2, a cytoplasmic Wnt signaling effector, but not with the non-  
376 phosphorylatable mutant S149A (Sahoo et al., 2012). Using G3BP1 fragments and co-IPs, the  
377 G3BP1:Dvl2 interaction was mapped to the NTF2-like domain and colocalization data was shown  
378 using immunofluorescence. To explain their results, the authors proposed that S149  
379 phosphorylation changes the conformation of G3BP1 NTF2-like domain, promoting its  
380 interaction with Dvl2. While this is possible, the conformational change may be due to the S99P  
381 mutation rather than the S149E mutation, as we show that the S99P mutation mediates DVL2  
382 colocalization in foci that lack the SG marker eIF4G1 (Fig. S3B).

383

384 Hinton et al. showed that overexpressed pseudo-phosphatase MK-STYX interacts with G3BP1  
385 and inhibits the assembly of SGs, and first hypothesized that MK-STYX inhibition of SG assembly  
386 is G3BP-S149 dependent (Hinton et al., 2010), but subsequently showed that SG assembly is  
387 independent of S149 phosphorylation (Barr et al., 2013), using the original phosphomimetic  
388 (S149E) and non-phosphorylatable (S149A) mutants. Surprisingly, overexpression of  
389 mutationally-activated MK-STYX shows opposite effects; it induces rather than blocks SGs as  
390 does the native, enzymatically-dead version, and is capable of de-phosphorylating G3BP (Barr et  
391 al., 2013). Considering the SG-inhibitory effects of the S99P mutation in the S149E construct, it is  
392 possible that a clean S149E construct co-expressed with MK-STYX (native) would not have the  
393 same effects, as it allows the formation of SGs to the same extent as WT (Fig. 1E, 2A) or may  
394 block the formation of SGs induced by mutationally-activated MK-STYX. In the latter case, it  
395 would imply that a hypothetical blockage of SG assembly is dependent on the phosphorylation  
396 of S149. However, this is speculative and requires confirmation.

397

398 The NAD<sup>+</sup> dependent deacetylase SIRT6 localizes to SGs and interacts with G3BP1, and loss of  
399 SIRT6 impairs SG formation and delays disassembly during recovery (Jedrusik-Bode et al., 2013).  
400 This study also shows that SIRT6 influences the phosphorylation of G3BP1 at serine 149, but no  
401 differences were reported on the interaction between SIRT6 and G3BP1-S149A or S149E

402 (Jedrusik-Bode et al., 2013). This suggests that the interaction between G3BP1 and SIRT6 is  
403 independent of the NTF2-like domain and acidic region of G3BP1.

404

405 Recently, Sahoo et al., 2018 reported that in intact rat neurons translation of specific axonal  
406 mRNAs are negatively regulated by G3BP aggregation in SG like structures which can be  
407 removed by dispersion of G3BP aggregates (Sahoo et al., 2018). Using the GFP-G3BP1-S149A  
408 and S149E plasmids, the authors showed that S149E did not aggregate HuR-positive SGs, and  
409 S149E showed a higher mobility in FRAP recovery experiments. S149 phosphorylation in  
410 regenerating neurons was shown using commercial phosphospecific antibody. The authors  
411 report that S149 is de-phosphorylated upon SA treatment, again by using the S149  
412 phosphospecific antibody, but unfortunately the data is not shown.

413

414 Rasputin, the single *Drosophila* ortholog of G3BP1/G3BP2, does not require phosphorylation at  
415 S142 (orthologous to mammalian S149) for SA-induced SG assembly, but phospho-S142 is  
416 required for amino-acid starvation to induce SGs (Aguilera-Gomez et al., 2017). Their data  
417 indicates that phosphorylation of rasputin/G3BP does not invariably suppress SG formation, but  
418 may actually promote it under certain conditions. Finally, casein kinase 2 (CK2) activity and S149  
419 phosphorylation were recently linked to SG disassembly rather than assembly (Reineke et al.,  
420 2017).

421

422 It is clear that phosphorylation of endogenous G3BP occurs at S149, but the meaning of this is  
423 still unresolved. Our data indicate that S149 phosphorylation is not a simple switch that  
424 determines whether G3BP assembles SGs. It is still possible that S149 phosphorylation  
425 influences the mutually exclusive interaction of USP10 and Caprin1 in the context of recovery  
426 and disassembly of SGs, whereby the interaction of USP10 with G3BP1 is favored and USP10 can  
427 act as a “decondensase” of SGs (Kedersha et al., 2016). Alternatively, this site may influence  
428 G3BP in a signaling context, by regulating its interactions with other proteins.

429

430

431

432

433 **Material and Methods:**

434 PCR mutations in pEGFP-C1-G3BP1 plasmids:

435 The original constructs encoding pEGFP-C1-G3BP1-wt, pEGFP-C1-G3BP1-S149A and pEGFP-C1-  
436 G3BP1-S149E were a kind gift from Jamal Tazi, and were obtained from his lab on two  
437 independent occasions (July 2004, and July 2016), and sequenced throughout the coding region.  
438 Mutations were introduced into pEGFP-C1-G3BP1-wt as follows. The 5' phosphorylated primers  
439 (see Table S1 for sequences) were mixed with 1 ng of pEGFP-C1-G3BP1-wt plasmids in a 1x  
440 Phusion PCR mastermix (Thermo Fisher Scientific) at a final volume of 25  $\mu$ L. The mixture was  
441 denatured at 98°C for 30s, followed by 25 cycles of the following: 98°C for 10s, 60°C for 15s,  
442 72°C for 2 min 30s, with a final extension step of 72°C for 5 min. 25 ng of the PCR product was  
443 ligated with T4 DNA Ligase (NEB) in a final volume of 10  $\mu$ L for 1h at RT. 5  $\mu$ L of the ligation mix  
444 was used for chemical transformation into high efficiency *E.coli*. Multiple clones were picked  
445 and verified by sequencing throughout the entire coding region. Sequencing reactions were  
446 carried out with an ABI3730xl DNA analyzer at the DNA Resource Core of Dana-Farber/Harvard  
447 Cancer Center (funded in part by NCI Cancer Center support grant 2P30CA006516-48).

448

| Mutation | Plasmid                | Forward primer                      | Reverse primer                      |
|----------|------------------------|-------------------------------------|-------------------------------------|
| A54T     | pEGFP-G3BP1-wt         | 5'Phos-CCAGCAGATACTGTCTACGGACAGAAAG | 5'Pho-CTTTCATTTGAATCCAATCCCCATGGA   |
| S99P     | pEGFP-G3BP1-wt         | 5'Phos-GGGGCTTCTCCTAACAACAACCAGG    | 5'Phos-ATCACCTGGACTACCACCATCATTTAGC |
| S99P     | pcDNA-Flag-G3BP1-wt    | 5'Phos-GGGGCTTCTCCTAACAACAACCAGG    | 5'Phos-ATCACCTGGACTACCACCATCATTTAGC |
| S149A    | pEGFP-G3BP1-A54T-S149A | 5'Phos-CCAGCAGATGCAGTCTACGGACAGAAAG | 5'Phos-CTTTCATTTGAATCCAATCCCCATGGA  |
| S149E    | pEGFP-G3BP1-S99P-S149E | 5'Phos-GGGGCTTCTCCTAACAACAACCAGG    | 5'Phos-ATCACCTGGACTACCACCATCATTTAGC |

449 Table S1: Primer sequences.

450

451 Bacterially-expressed protein production:

452 The pET28-G3BP1-168-wt, S149A-(A54T) and S149E-(S99P) expression vectors were transformed  
453 into T7 express cells (NEB) and proteins were produced as described previously (Schulte et al.,  
454 2016). The poly-histidine-tagged G3BP1-WT as well as the mutated S149A and S149E constructs  
455 were purified using immobilized metal affinity (IMAC, HisTrap FF, GE Healthcare) and the dimer  
456 was isolated using size exclusion chromatography on a Superdex 75 column (GE Healthcare).

457

458 Structural analysis:

459 The structure and the effect of the mutations were analyzed using PyMOL, Arpeggio, PHENIX  
460 ralyze, Coot, as well as the Rosetta BackRuband ROSIE servers to predict the backrub models  
461 and sequence tolerance frequencies (Adams et al., 2002; Davis et al., 2006; Davis et al., 2007;  
462 Emsley and Cowtan, 2004; Lauck et al., 2010; Smith and Kortemme, 2011).

463

464 Cell lines:

465 COS7 cells, U2OS-wt,  $\Delta\Delta G3BP1/2$  U2OS,  $\Delta\Delta G3BP1/2$  U2OS + GFP-G3BP1-wt (Kedersha et al.,  
466 2016) cells were maintained at 5.0-7.0% CO<sub>2</sub> in DMEM containing 20 mM HEPES, 10% fetal  
467 bovine serum, 100 U/mL penicillin and 100 µg/mL streptomycin.

468

469 Transient transfection:

470 For transient transfections, U2OS-wt and  $\Delta\Delta G3BP1/2$  U2OS cells (Kedersha et al., 2016) at 80-  
471 90% confluency were transfected using Lipofectamine 2000 (Invitrogen) following  
472 manufacturer's instructions and processed after 24h. COS7 cells were transfected using  
473 SuperFect (Qiagen) and harvested after 38-42 h.

474

475 SG induction and quantification:

476 SGs were induced by treatment with sodium arsenite (500 µM, 1h), clotrimazole (20 µM in  
477 serum-free media, 1h), pateamine A (50 nM, 1h), or by transient transfection of SG-nucleating  
478 proteins. Cells were scored for SGs by manual counting using fluorescent microscopy, using TIA1  
479 and eIF4G1 or eIF3b as SG markers; only cells with granules co-staining for these markers were  
480 considered SGs, and a minimum of 3 granules per cell was required to score as positive.

481

482 Immunoblotting:

483 Transient transfected COS7,  $\Delta\Delta G3BP1/2$  U2OS cells were lysed in EE-lysis buffer (50 mM HEPES,  
484 150 mM NaCl, 2.5 mM EGTA, 5 mM EDTA, 0.5% NP40, 10% glycerol, 1 mM DTT, 0,1 mg/mL  
485 Heparin, HALT phosphatase and protease inhibitors; Thermo Fisher Scientific). Lysates were  
486 resolved in a 4-20% Mini-PROTEAN TGX Precast Gel (Bio-Rad) and transferred to nitrocellulose  
487 membranes using the Transfer-Blot Turbo transfer system (Bio-Rad). Chemiluminescent was  
488 detected using SuperSignal West Pico substrate (Thermo Fisher Scientific).

489 Immunoprecipitation:

490 100-mm dishes of 80-90%-confluent cells  $\Delta\Delta$ G3BP1/2 U2OS cells were transiently transfected  
491 for 24h, washed with cold HBSS, and scrape-harvested at 4°C into EE-lysis buffer. Cells were  
492 rotated for 10 min at 4°C, cleared by centrifugation (10.000 g, 10 min, 4°C), and incubated with  
493 anti-GFP beads or anti-Flag-M2 affinity agarose (Sigma-Aldrich) for 2h with continuous rotation  
494 at 4°C. Anti-GFP beads were produced by expressing the GFP nanobody “Enhancer” (Kirchhofer  
495 et al., 2010) in *E.coli*, purified by size-exclusion, and coupled to cyanogen-bromide activated  
496 Sepharose (Sigma-Aldrich). Beads were washed in EE-lysis buffer and eluted directly into 2x SDS-  
497 sample buffer. Proteins were resolved in a 4-20% Mini-PROTEAN TGX Precast Gel (Bio-Rad) and  
498 transferred to nitrocellulose membranes using the Transfer-Blot Turbo transfer system (Bio-Rad)  
499 and blotted using standard procedures. Chemiluminescent was detected using SuperSignal West  
500 Pico substrate (Thermo Fisher Scientific). COS7 cells were transfected and immunoprecipitated  
501 using GFP-TRAP (ChromoTek), as described previously (Kedersha et al., 2016).

502

503 Immunoprecipitation of GFP-G3BP1-wt for mass spectrometry:

504 150-mm dishes of 80-90% confluent  $\Delta\Delta$ G3BP1/2 U2OS stably expressing GFP-G3BP1-wt were  
505 left untreated or treated with 500  $\mu$ M sodium arsenite for 1h. Then cells were washed with cold  
506 PBS, and scrape-harvested at 4°C into EE-lysis buffer. Cells were rotated for 10 min at 4°C,  
507 cleared by centrifugation (10,000 g, 10 min, 4°C), and incubated with anti-GFP beads for 2h with  
508 continuous rotation at 4°C. Beads were washed two times in EE-lysis buffer (500 mM NaCl) and  
509 three times in standard EE-lysis buffer (150 mM NaCl), then eluted directly into 2x SDS-sample  
510 buffer. Proteins were resolved in a 4-12% NuPAGE BT gel (Invitrogen) and stained with  
511 Coomassie Blue. GFP-G3BP1-wt bands were excised and sent for mass spectrometry. In a second  
512 experimental setup we generated G3BP1 peptides by on bead trypsin digest, skipping SDS-PAGE  
513 and Coomassie Blue staining.

514

515 Immunoprecipitation of endogenous G3BP1 for mass spectrometry

516 150 mm dishes of 80-90% confluent U2OS-wt cells were treated and lysed as described above.  
517 The day before harvest respectively 150  $\mu$ g of protein G beads (Pierce, Thermo Fisher Scientific)  
518 slurry was either incubated overnight with 15  $\mu$ g G3BP1 (Santa Cruz, TT-Y) or 15  $\mu$ g G3BP1  
519 (Santa Cruz, H-10) or 15  $\mu$ g G3BP1 (BD Transduction laboratories) in 1 mL EE-lysis buffer. Bead-  
520 immobilized G3BP1 antibody was washed once with EE-lysis buffer. Then 1 mL of U2OS-wt cell

521 lysate was added to anti-G3BP1 (SC, TT-Y)/protein G beads and incubated for 1h at 4°C.  
522 Afterwards anti-G3BP1 (TT-Y)/protein G beads were spun down and supernatant was collected  
523 for next IP. Supernatants from the IPs were then incubated for 1h at 4°C with anti-G3BP1 (SC, H-  
524 10)/protein G beads. Then G3BP1 (H-10)/protein G beads were spun down, and supernatants  
525 collected and incubated for 1h at 4°C with anti-G3BP1 (BD)/protein G beads. All G3BP1/protein  
526 G beads were collected (450 µL total) and washed 5x with 2 mL EE-lysis buffer. Beads were then  
527 drained from washing buffer, resuspended in 500 µL in EE-lysis buffer and G3BP peptides were  
528 generated by on bead trypsin digest for mass spectrometry analysis. Lysates, combined  
529 supernatants and combined IPs were analyzed by SDS PAGE and western blotting for G3BP1 (H-  
530 10).

531

532 SP3 based sample preparation for MS analysis:

533 Elution from the GFP immunoprecipitation beads and endogenous G3BP1-wt IPs was done by  
534 addition of 200 µl of SDS buffer (4 % SDS, 50 mM HEPES pH 7.6, 1 mM DTT). After heating at  
535 56°C for 5 min, the supernatant of each sample (250 µl) was transferred to a fresh tube. For  
536 cysteine blocking, 30 µl of 0.4 M chloroacetamide solution was added to each sample followed  
537 by a modified SP3 sample preparation (Hughes et al., 2014).

538 Briefly, two suspensions of magnetic beads (Sera-Mag Speed beads – carboxylate modified  
539 particles, P/N 65152105050250 + P/N 45152105050250, Thermo Fisher Scientific) were shaken  
540 gently until suspended. 50 µl of each suspension were combined in one tube, washed 3x with  
541 500 µl of milliQ water and re-suspended in 500 µl of milliQ water. 50 µl of SP3 bead stock was  
542 added to each sample and gently mixed by pipetting. 400 µl of neat acetonitrile (ACN) was  
543 added to a final ACN composition of over 50%, incubated for 20 min with continuous rotation.  
544 Samples were then placed in the magnetic rack, incubated for 2 min and the supernatant  
545 discarded. The beads were washed 2x with 200 µl of 70% EtOH, with a final wash of 180 µl of  
546 neat ACN, and subsequent drying. The beads were then reconstituted in 100 µl of trypsin  
547 solution (50 mM HEPES pH 7.6, 0.5 M urea, 1 µg trypsin) and incubated for 16 h at 37°C. After  
548 incubation the supernatant was collected and transferred to a new tube, acidified with formic  
549 acid (final concentration 3%) and cleaned by reversed phase solid phase extraction (STRATA-X  
550 from Phenomenex, P/N 8B-S100-TAK) following the manufacturer's instructions. After drying in  
551 the speedvac, samples were dissolved in 20 µl of 3% ACN, 0.1% formic acid prior to MS analysis.

552

553 LC-MS analysis:

554 Each sample was run in technical triplicates in addition to the biological replicates. For each LC-  
555 MS run the auto sampler (Ultimate 3000 RSLC system, Thermo Scientific Dionex) injected 5  $\mu$ l of  
556 sample into a C18 guard desalting column (Acclaim pepmap 100, 75 $\mu$ m x 2cm, nanoViper,  
557 Thermo). After 6 min of flow at 5  $\mu$ l/min, the 10-port valve switched to analysis mode in which  
558 the NC pump provided a flow of 250 nL/min through the guard column. Mobile phase A was  
559 95% water, 5% dimethylsulfoxide (DMSO), 0.1% formic acid. The slightly concave gradient (curve  
560 4 in Chromeleon Xpress) then proceeded from a 3% mobile phase B (90% acetonitrile, 5%  
561 DMSO, 5% water, and 0.1% formic acid) to 45% B in 65 min followed by a 10 min wash at 99% B  
562 and re-equilibration with 3% B for 5 min. Total LC-MS run time was 84 min. We used a nano  
563 EASY-Spray column (pepmap RSLC, C18, 2  $\mu$ m bead size, 100  $\text{\AA}$ , 75  $\mu$ m internal diameter, 50 cm  
564 long, Thermo Fisher Scientific) on the nano electrospray ionization (NSI) EASY-Spray source  
565 (Thermo Fisher Scientific) at 60°C. Online LC-MS was performed using a hybrid Q-Exactive mass  
566 spectrometer (Thermo Fisher Scientific). FTMS master scans with 70,000 resolution (and mass  
567 range 300-1900 m/z) were followed by data-dependent MS/MS (35,000 resolution) on the top 5  
568 ions using higher energy collision dissociation (HCD) at 30% normalized collision energy.  
569 Precursors were isolated with a 2 m/z window and a 0.5 m/z offset. Automatic gain control  
570 (AGC) targets were 1e6 for MS1 and 1e5 for MS2. Maximum injection times were 100 ms for  
571 MS1 and 400 ms for MS2. The entire duty cycle lasted  $\sim$ 1.5 s. Dynamic exclusion was used with  
572 30 s duration. Precursors with unassigned charge state or charge state 1 were excluded. An  
573 underfill ratio of 1% was used.

574

575 Proteomics database search:

576 All MS/MS spectra were searched by Sequest/Percolator under the software platform Proteome  
577 Discoverer (PD 1.4, Thermo Fisher Scientific) using a target-decoy strategy. The reference  
578 database was either the swissprot human protein database (42096 canonical and isoform  
579 protein entries, 2017-02) from uniprot.org or a database containing only the G3BP1 human  
580 protein entry. Precursor mass tolerance of 10 ppm and product mass tolerance of 0.02 Da were  
581 used. Additional settings were trypsin with one missed cleavage; Lys-Pro and Arg-Pro not  
582 considered as cleavage sites; carbamidomethylation on cysteine as fixed modification; and  
583 oxidation of methionine and phosphorylation on serine, threonine or tyrosine as variable  
584 modifications. Peptides found at 1% FDR (false discovery rate) were used by the protein



585 grouping algorithm in PD to infer protein identities. Phosphorylation sites within a peptide  
586 sequence were assigned using the PhosphoRS node in PD. Peptide and protein areas, which  
587 serve as surrogates for the respective relative quantities across the samples, were calculated by  
588 the Precursor Ions Area Detector node in PD.

589

590 Immunofluorescence:

591 Cells were fixed and processed for fluorescence microscopy as described previously (Kedersha  
592 and Anderson, 2007). Briefly, cells were grown on glass coverslips, stressed as indicated, fixed  
593 using 4% paraformaldehyde in PBS for 10 min, followed by 5 min post-fixation/permeabilization  
594 in ice-cold methanol. Cells were blocked for 1h in 5% horse serum/PBS, and primary and  
595 secondary incubations performed in blocking buffer for 1h with rocking. All secondary  
596 antibodies were multi-labeling grade (tagged with Cy2, Cy3, Cy5, Jackson Immunoresearch).  
597 Following washes with PBS, cells were mounted in polyvinyl mounting media and viewed using a  
598 Nikon Eclipse E800 microscope with a 63X Plan Apo objective lens (NA 1.4) and illuminated with  
599 a mercury lamp and standard filters for DAPI (UV-2A 360/40; 420/LP), Cy2 (FITC HQ 480/40;  
600 535/50), Cy3 (Cy 3HQ 545/30; 610/75), and Cy5 (Cy 5 HQ 620/60; 700/75). Images were  
601 captured using a SPOT RT digital camera (Diagnostics Instruments) with the manufacturer's  
602 software, and raw TIF files were imported into Adobe Photoshop CS3. Identical adjustments in  
603 brightness and contrast were applied to all images in a given experiment.

604

605 Drugs and chemical reagents:

606 DMD-modified patamine A was a kind gift from Jun Lui of Johns Hopkins. Sodium arsenite and  
607 clotrimazole were obtained from Sigma.

608

609 Statistical analysis:

610 Statistical analysis was performed using Microsoft Excel. Statistical differences between two  
611 groups in immunofluorescence based SG quantification, western blot experiments or mass  
612 spectrometry analysis were evaluated using unpaired Student's t-test.  $p < 0.05$  was considered  
613 significant. All data are expressed as mean +/- SEM.

614

615

616



| Antigen          | Species | Catalog number (Clone)                | Source                         |
|------------------|---------|---------------------------------------|--------------------------------|
| Actin            | Mouse   | Sc-8432                               | Santa Cruz Biotechnology, Inc. |
| Caprin1          | Rabbit  | 15112-1-AP                            | Proteintech Group              |
| eIF4G1           | Rabbit  | Sc-11373                              | Santa Cruz Biotechnology, Inc. |
| eIF3b            | Goat    | Sc-16377 (N-20)                       | Santa Cruz Biotechnology, Inc. |
| Flag             | Mouse   | F3165                                 | Sigma-Aldrich                  |
| GAPDH            | Mouse   | Sc-47724                              | Santa Cruz Biotechnology, Inc. |
| G3BP1<br>Epitope | Mouse   | Sc-81940 (TT-Y)<br>Recombinant hG3BP1 | Santa Cruz Biotechnology, Inc. |
| G3BP1<br>Epitope | Mouse   | Sc-365338 (H-10)<br>aa 158-251 hG3BP1 | Santa Cruz Biotechnology, Inc. |
| G3BP1<br>Epitope | Mouse   | 611126<br>aa 210-323 hG3BP1           | BD Transduction Laboratories   |
| phos-G3BP1-S149  | Rabbit  | G8046                                 | Sigma-Aldrich                  |
| GFP              | Rabbit  | ab290                                 | Abcam                          |
| GFP              | Chicken | G160                                  | ABM                            |
| HA               | Mouse   | MMS-101R                              | Covance                        |
| Sequestosome 1   | Mouse   | Sc-28359                              | Santa Cruz Biotechnology, Inc  |
| TIA1             | Goat    | sc-1751                               | Santa Cruz Biotechnology, Inc. |
| USP10            | Rabbit  | A300-900A                             | Bethyl Laboratories            |
| USP10            | Rabbit  | A300-901A1                            | Bethyl Laboratories            |
| Ubiquitin        | Mouse   | Sc-271289                             | Santa Cruz Biotechnology, Inc  |

617 Table S2: List of antibodies used in this study.

618

## 619 Acknowledgements

620 This work was supported by National Institutes of Health (GM126901) to P. Anderson, National  
621 Institutes of Health (126150) to P. Ivanov, and by the Swedish Association of Medical Research  
622 (Svenska Sällskapet för Medicinsk Forskning, SSMF) to M. Panas.

623

624 The authors declare no competing financial interests.

625

626 Abbreviations used in this paper:

627 MS, mass spectrometry; SA, sodium arsenite; CZ, clotrimazole; eIF, eukaryotic initiation factor;  
628 IP, immunoprecipitate; KO, knockout; Pat A, Pateamine A; p-eIF2 $\alpha$ , phospho-eIF2 $\alpha$ ; SG, stress  
629 granule; wt, wild type; NTF2-like, nuclear transport factor 2 like; PIC, 48S preinitiation complex;  
630

631 **Figure legends:**

632 **Figure 1:**

633 G3BP1-S99P and G3BP1-S99P-S149E mutants exhibit both impaired SG nucleation and  
634 recruitment to SGs in U2OS-wt cells. (A) Pictogram of GFP-G3BP1-S149A showing the additional  
635 mutation A54 to Thr (red) or GFP-G3BP1-S149E showing the additional mutation at position S99  
636 to Pro (red). The S149 site is indicated in yellow. Gray boxes represent structured classical  
637 domains, and red areas indicate  $\geq 50\%$  predicted ID/IU regions, whereas aqua shading represent  
638 LC-regions. (B) Crystal structure of the NTF2-like domain of G3BP1. The C $\alpha$  atoms of the two  
639 accidental secondary mutations A54T and S99P are highlighted as spheres colored in light pink  
640 and pink, respectively. Strands, helices and loop regions are colored in yellow, red and light grey.  
641 The second unit of the dimer is shown in grey. (C) Close-up view of the mutated residues.  
642 Peptides are represented in stick format, oxygen and amino-groups in blue and red,  
643 respectively. Carbons are colored according to the color code for strands, helices and loops as in  
644 (B). Hydrogen bonds and hydrophobic contacts of the mutated residues are illustrated as red  
645 and grey dashes. The cartoon figures in the right panels are shown for better orientation with  
646 same color code as in (B). (D) Quantification of SG data in (E), using TIA1 and eIF4G1 as SG  
647 markers. Data shown are mean  $\pm$  SEM and analyzed using unpaired t-test. \*,  $P < 0.05$ ; \*\*\*,  $P <$   
648  $0.005$ ;  $n = 5$ . (E) Localization of GFP-tagged proteins (green) in transiently-transfected U2OS  
649 cells, untreated (Mock) or treated with 500  $\mu$ M sodium arsenite (SA) for 1h prior to fixing and  
650 staining for endogenous TIA1 (red) and eIF4G1 (blue in merged view, grey in separate channel).  
651 Bar, 10  $\mu$ m.

652

653 **Figure 2:**

654 G3BP1-S99P-containing mutants exhibit reduced SG rescue in  $\Delta\Delta$ G3BP1/2 cells. (A) Cells were  
655 transiently transfected with the indicated GFP-tagged (green) constructs, then untreated (Mock)  
656 or treated with 500  $\mu$ M sodium arsenite (SA) for 1h. Cells were fixed and stained for endogenous  
657 TIA1 (red) and eIF4G1 (blue, represented as grey). Bar, 10  $\mu$ m. (B) Quantification of SGs in cells  
658 shown in A, scored using TIA1 and eIF4G1 as SG markers. Data shown are mean  $\pm$  SEM and

659 analyzed using unpaired t-test. \*,  $P < 0.05$ ; \*\*,  $P < 0.01$ ; \*\*\*,  $P < 0.005$ ;  $n = 4$ . (C) Western blot of  
660 transfectants shown in (A). Lower portion, longer exposure. \* indicates altered GFP products. (D)  
661 Transiently overexpressed constructs in  $\Delta\Delta$ G3BP1/2 U2OS cells, blotted as indicated. Upper (Up)  
662 membrane exposure shorter than the lower part (Low) of the membrane. \* indicates altered  
663 GFP or G3BP1 products in the mutants.

664

665 **Figure 3:**

666 G3BP1-S99P exhibits reduced expression, increased ubiquitination, and recruits sequestosome  
667 into SGs. (A-D) COS7 cells were transiently transfected with the indicated GFP (green)  
668 constructs, fixed and stained for endogenous sequestosome/p62 (red) and eIF3b (blue). Boxed  
669 areas are shown below each panel, with colors separated (gray represents blue). Bar, 25  $\mu$ m. (E)  
670 Transient co-expression of GFP-G3BP1 mutants with an HA-tagged reporter construct,  
671 quantified by western blot/densitometry for GFP and HA (Fig. S3A), expression of GFP to HA was  
672 normalized relative to the wt control, and relative values were plotted. Data shown are mean  
673 +/- SEM and analyzed using unpaired t-test. ns, not significant; \*\*,  $P < 0.01$ ; \*\*\*,  $P < 0.001$ ;  $n =$   
674 3. (F) GFP-G3BP1 constructs transiently expressed in COS7 cells, precipitated using GFP-TRAP,  
675 and blotted as indicated. (G) Transient overexpression of indicated GFP-G3BP1 constructs in  
676  $\Delta\Delta$ G3BP1/2 U2OS cells, immunoprecipitated using anti-GFP and blotted as indicated. (H)  
677 Caprin1, USP10, and G3BP1 were quantified from IP Western blots (G) using densitometry and  
678 the fold change of Caprin1 or USP10 relative to GFP-G3BP1 was determined. Data shown are  
679 mean  $\pm$  SEM;  $n = 8$ . (I) Transient co-overexpression of indicated GFP-G3BP1 and Flag-G3BP1  
680 constructs in  $\Delta\Delta$ G3BP1/2 U2OS cells, immunoprecipitated using anti-GFP and blotted as  
681 indicated. (J) GFP signal was quantified from lysates and GFP-IP Western blots using  
682 densitometry. Relative intensities to wt/wt co-overexpression were plotted. Data shown are  
683 mean +/- SEM and analyzed using unpaired t-test. ns, not significant;  $n = 3$ . (K) Flag signal was  
684 quantified from lysates and GFP-IP Western blots using densitometry. Relative intensities to  
685 wt/wt co-overexpression were plotted. Data shown are mean +/- SEM and analyzed using  
686 unpaired t-test. ns, not significant; \*,  $P < 0.05$ ; \*\*,  $P < 0.01$ ;  $n = 3$ .

687

688 **Figure 4:**

689 Phosphorylation of G3BP1-S149 and S232 is unaltered by SA treatment. (A) Mass spectrometry  
690 analysis of endogenous G3BP1-S149 and G3BP1-S232 phosphorylation following mock or 1h SA

691 (500  $\mu$ M) treatment. Data shown are mean  $\pm$  SEM and are analyzed using the unpaired t-test.  
692 ns, not significant; n = 4. (B) Mass spectrometry analysis of stably expressed GFP-G3BP1-S149  
693 and GFP-G3BP1-S232 phosphorylation in  $\Delta\Delta$ G3BP1/2 U2OS cells during mock or 1h SA (500  $\mu$ M)  
694 treatment. Data shown are mean  $\pm$  SEM and are analyzed using the unpaired t-test. ns, not  
695 significant; n = 6.

696

697 **Figure S1:**

698 (A) Size exclusion and SDS-PAGE analysis of heterologously produced G3BP1-1-168 wild-type,  
699 S149A (unintentional A54T) and S149E (unintentional S99P) constructs. The SEC profile of the  
700 NTF2-like G3BP1 domain (sequence-derived MW is 18 kDa) used for crystallization is shown for  
701 comparison. Wild-type G3BP1-1-168 (30 kDa) yielded a major peak at a retention volume of  
702 about 52 mL, corresponding to an apparent MW of 65 kDa, in agreement with the theoretical  
703 size of the dimer. The S149A (A54T) mutant eluted at about 58 mL corresponding to an apparent  
704 MW of 45 kDa, in-between the monomer and dimer. For the S149E (S99P) construct a major  
705 peak at the void volume of the column was obtained, indicating aggregated protein. SDS-PAGE  
706 analysis showed protein bands at the expected MW of about 30 kDa for the combined major  
707 peak fractions of G3BP1-wt and S149A (A54T). We did not detect any S149E (S99P) protein in  
708 the indicated fractions that were chosen based on the purification of the wild-type and S149A  
709 (A54T) protein. The major “void” peak was not analyzed in SDS-PAGE. Numbers 1 and 2 indicate  
710 before and after concentrating the combined fractions using ultracentrifugation. (B) *In silico*  
711 substitution of Ser-99 to Pro in monomer A and B shifts the formerly favored Phi/Psi angles of  
712 Ser (top 1, green arrows) into disallowed regions in the proline Ramachandran plot (below 4, red  
713 arrows). (C) The ranked table of residues with their respective predicted frequencies illustrates  
714 that both wild-type residues at positions 54 and 99 are favored in the two chains of the NTF2  
715 dimer (a, b). The red line indicates a typical cutoff of picking the top 5 amino acid choices at each  
716 position. While threonine (red boxes) appears among the five highest ranked residues in one  
717 chain of the dimer, proline at position 99 (red boxes) is listed at the lower end of the ranked  
718 table of both chains. (D) ‘Backrub’-modeled structures of S99P mutants reveal a 2.5 Å  
719 perturbation of the Ser-99 associated loop. The models of A54T are almost identical to the wild-  
720 type structure with perturbations in the range of 0.2 Å. Cartoons were drawn and color-coded as  
721 in Figure 1B. The perturbation of the loops was measured as point-to-point distances of the  
722 highlighted wild-type C $\alpha$ -atom (grey sphere) to the respective atom in the mutant structures.

723 **Figure S2:**

724 GFP-G3BP1-S99P and GFP-G3BP1-S99P-S149E mutants display reduced SG rescue.  $\Delta\Delta$ G3BP1/2  
725 U2OS cells transiently transfected with the indicated GFP (green) constructs, then treated with  
726 20  $\mu$ M clotrimazole (CZ) or 50 nM pateamine A (Pat A) for 1h. Cells were fixed and stained for  
727 endogenous TIA1 (red) and eIF4G1 (blue represented as grey). Bar, 10  $\mu$ m.

728

729 **Figure S3:**

730 Overexpressed Dvl2 forms shells around G3BP1-S99P and does not recruit eIF4G1 in  $\Delta\Delta$ G3BP1/2  
731 U2OS cells. (A) Transient co-expression of GFP-G3BP1 mutants with an HA-tagged reporter  
732 construct, untreated or treated with MG132 for 8h, blotted as indicated. (B) GFP-tagged forms  
733 of G3BP1 (green) were co-transfected with Flag-Dvl2 (red) in U2OS (top 2 rows) or  $\Delta\Delta$ G3BP1/2  
734 U2OS (bottom 2 rows) unstressed or stressed with SA (500  $\mu$ M) for 1h. Cells were  
735 counterstained for eIF4G1 (blue). Bar, 10  $\mu$ m. (C)  $\Delta$ G3BP1 U2OS cells stably expressing GFP-  
736 G3BP1-wt, S149A (A54T), S149E (S99P). Lysed and separated by SDS PAGE, membrane stained  
737 with ponceau (right panel) and then blotted for phos-G3BP1-S149 (Sigma, G8046, left panel).

738

739 **References:**

- 740 Adams, P.D., R.W. Grosse-Kunstleve, L.W. Hung, T.R. Ioerger, A.J. McCoy, N.W. Moriarty, R.J.  
741 Read, J.C. Sacchettini, N.K. Sauter, and T.C. Terwilliger. 2002. PHENIX: building new  
742 software for automated crystallographic structure determination. *Acta Crystallogr D Biol*  
743 *Crystallogr.* 58:1948-1954.
- 744 Aguilera-Gomez, A., M. Zacharogianni, M.M. van Oorschot, H. Genau, R. Grond, T. Veenendaal,  
745 K.S. Sinsimer, E.R. Gavis, C. Behrends, and C. Rabouille. 2017. Phospho-Rasputin  
746 Stabilization by Sec16 Is Required for Stress Granule Formation upon Amino Acid  
747 Starvation. *Cell Rep.* 20:935-948.
- 748 Anderson, P., and N. Kedersha. 2008. Stress granules: the Tao of RNA triage. *Trends Biochem Sci.*  
749 33:141-150.
- 750 Barr, J.E., M.R. Munyikwa, E.A. Frazier, and S.D. Hinton. 2013. The pseudophosphatase MK-STYX  
751 inhibits stress granule assembly independently of Ser149 phosphorylation of G3BP-1.  
752 *FEBS J.* 280:273-284.
- 753 Bjørkøy, G., T. Lamark, A. Brech, H. Outzen, M. Perander, A. Overvatn, H. Stenmark, and T.  
754 Johansen. 2005. p62/SQSTM1 forms protein aggregates degraded by autophagy and has  
755 a protective effect on huntingtin-induced cell death. *J Cell Biol.* 171:603-614.
- 756 Bordeleau, M.E., R. Cencic, L. Lindqvist, M. Oberer, P. Northcote, G. Wagner, and J. Pelletier.  
757 2006a. RNA-mediated sequestration of the RNA helicase eIF4A by pateamine A inhibits  
758 translation initiation. *Chemistry & Biology.* 13:1287-1295.
- 759 Bordeleau, M.E., A. Mori, M. Oberer, L. Lindqvist, L.S. Chard, T. Higa, G.J. Belsham, G. Wagner, J.  
760 Tanaka, and J. Pelletier. 2006b. Functional characterization of IRESes by an inhibitor of  
761 the RNA helicase eIF4A. *Nat Chem Biol.* 2:213-220.
- 762 Buchan, J.R., and R. Parker. 2009. Eukaryotic Stress Granules: The Ins and Outs of Translation.  
763 *Molecular Cell.* 36:932-941.
- 764 Dang, Y., N. Kedersha, W.K. Low, D. Romo, M. Gorospe, R. Kaufman, P. Anderson, and J.O. Liu.  
765 2006. Eukaryotic initiation factor 2alpha-independent pathway of stress granule  
766 induction by the natural product pateamine A. *J Biol Chem.* 281:32870-32878.
- 767 Davis, I.W., W.B. Arendall, D.C. Richardson, and J.S. Richardson. 2006. The backrub motion: how  
768 protein backbone shrugs when a sidechain dances. *Structure.* 14:265-274.
- 769 Davis, I.W., A. Leaver-Fay, V.B. Chen, J.N. Block, G.J. Kapral, X. Wang, L.W. Murray, W.B.  
770 Arendall, J. Snoeyink, J.S. Richardson, and D.C. Richardson. 2007. MolProbity: all-atom

771 contacts and structure validation for proteins and nucleic acids. *Nucleic Acids Res.*  
772 35:W375-383.

773 Emsley, P., and K. Cowtan. 2004. Coot: model-building tools for molecular graphics. *Acta*  
774 *Crystallogr D Biol Crystallogr.* 60:2126-2132.

775 Farny, N.G., N.L. Kedersha, and P.A. Silver. 2009. Metazoan stress granule assembly is mediated  
776 by P-eIF2alpha-dependent and -independent mechanisms. *RNA.* 15:1814-1821.

777 Gilks, N., N. Kedersha, M. Ayodele, L. Shen, G. Stoecklin, L.M. Dember, and P. Anderson. 2004.  
778 Stress granule assembly is mediated by prion-like aggregation of TIA-1. *Mol Biol Cell.*  
779 15:5383-5398.

780 Han, T.W., M. Kato, S. Xie, L.C. Wu, H. Mirzaei, J. Pei, M. Chen, Y. Xie, J. Allen, G. Xiao, and S.L.  
781 McKnight. 2012. Cell-free formation of RNA granules: bound RNAs identify features and  
782 components of cellular assemblies. *Cell.* 149:768-779.

783 Hinton, S.D., M.P. Myers, V.R. Roggero, L.A. Allison, and N.K. Tonks. 2010. The  
784 pseudophosphatase MK-STYX interacts with G3BP and decreases stress granule  
785 formation. *Biochem J.* 427:349-357.

786 Hughes, C.S., S. Foehr, D.A. Garfield, E.E. Furlong, L.M. Steinmetz, and J. Krijgsveld. 2014.  
787 Ultrasensitive proteome analysis using paramagnetic bead technology. *Mol Syst Biol.*  
788 10:757.

789 Jedrusik-Bode, M., M. Studencka, C. Smolka, T. Baumann, H. Schmidt, J. Kampf, F. Paap, S.  
790 Martin, J. Tazi, K.M. Müller, M. Krüger, T. Braun, and E. Bober. 2013. The sirtuin SIRT6  
791 regulates stress granule formation in *C. elegans* and mammals. *J Cell Sci.* 126:5166-5177.

792 Kato, M., T.W. Han, S. Xie, K. Shi, X. Du, L.C. Wu, H. Mirzaei, E.J. Goldsmith, J. Longgood, J. Pei,  
793 N.V. Grishin, D.E. Frantz, J.W. Schneider, S. Chen, L. Li, M.R. Sawaya, D. Eisenberg, R.  
794 Tycko, and S.L. McKnight. 2012. Cell-free formation of RNA granules: low complexity  
795 sequence domains form dynamic fibers within hydrogels. *Cell.* 149:753-767.

796 Kedersha, N., and P. Anderson. 2002. Stress granules: sites of mRNA triage that regulate mRNA  
797 stability and translatability. *Biochem Soc Trans.* 30:963-969.

798 Kedersha, N., and P. Anderson. 2007. Mammalian stress granules and processing bodies.  
799 Translation Initiation: Cell Biology, High-Throughput Methods, and Chemical-Based  
800 Approaches. 431:61-+.

- 801 Kedersha, N., S. Chen, N. Gilks, W. Li, I.J. Miller, J. Stahl, and P. Anderson. 2002. Evidence that  
802 ternary complex (eIF2-GTP-tRNA(i)(Met))-deficient preinitiation complexes are core  
803 constituents of mammalian stress granules. *Mol Biol Cell*. 13:195-210.
- 804 Kedersha, N., M.R. Cho, W. Li, P.W. Yacono, S. Chen, N. Gilks, D.E. Golan, and P. Anderson. 2000.  
805 Dynamic shuttling of TIA-1 accompanies the recruitment of mRNA to mammalian stress  
806 granules. *J Cell Biol*. 151:1257-1268.
- 807 Kedersha, N., P. Ivanov, and P. Anderson. 2013. Stress granules and cell signaling: more than just  
808 a passing phase? *Trends Biochem Sci*. 38:494-506.
- 809 Kedersha, N., M.D. Panas, C.A. Achorn, S. Lyons, S. Tisdale, T. Hickman, M. Thomas, J. Lieberman,  
810 G.M. McInerney, P. Ivanov, and P. Anderson. 2016. G3BP-Caprin1-USP10 complexes  
811 mediate stress granule condensation and associate with 40S subunits. *J Cell Biol*.  
812 212:845-860.
- 813 Kedersha, N.L., M. Gupta, W. Li, I. Miller, and P. Anderson. 1999. RNA-binding proteins TIA-1 and  
814 TIAR link the phosphorylation of eIF-2 alpha to the assembly of mammalian stress  
815 granules. *J Cell Biol*. 147:1431-1442.
- 816 Kirchhofer, A., J. Helma, K. Schmidhals, C. Frauer, S. Cui, A. Karcher, M. Pellis, S. Muyldermans,  
817 C.S. Casas-Delucchi, M.C. Cardoso, H. Leonhardt, K.P. Hopfner, and U. Rothbauer. 2010.  
818 Modulation of protein properties in living cells using nanobodies. *Nat Struct Mol Biol*.  
819 17:133-138.
- 820 Kwon, S., Y. Zhang, and P. Matthias. 2007. The deacetylase HDAC6 is a novel critical component  
821 of stress granules involved in the stress response. *Genes Dev*. 21:3381-3394.
- 822 Lauck, F., C.A. Smith, G.F. Friedland, E.L. Humphris, and T. Kortemme. 2010. RosettaBackrub--a  
823 web server for flexible backbone protein structure modeling and design. *Nucleic Acids*  
824 *Res*. 38:W569-575.
- 825 Markmiller, S., S. Soltanieh, K.L. Server, R. Mak, W. Jin, M.Y. Fang, E.C. Luo, F. Krach, D. Yang, A.  
826 Sen, A. Fulzele, J.M. Wozniak, D.J. Gonzalez, M.W. Kankel, F.B. Gao, E.J. Bennett, E.  
827 Lécuyer, and G.W. Yeo. 2018. Context-Dependent and Disease-Specific Diversity in  
828 Protein Interactions within Stress Granules. *Cell*. 172:590-604.e513.
- 829 Panas, M.D., P. Ivanov, and P. Anderson. 2016. Mechanistic insights into mammalian stress  
830 granule dynamics. *J Cell Biol*. 215:313-323.



- 831 Panas, M.D., T. Schulte, B. Thaa, T. Sandalova, N. Kedersha, A. Achour, and G.M. McInerney.  
832 2015. Viral and Cellular Proteins Containing FGDF Motifs Bind G3BP to Block Stress  
833 Granule Formation. *PLoS Pathog.* 11:e1004659.
- 834 Pankiv, S., T.H. Clausen, T. Lamark, A. Brech, J.A. Bruun, H. Outzen, A. Øvervatn, G. Bjørkøy, and  
835 T. Johansen. 2007. p62/SQSTM1 binds directly to Atg8/LC3 to facilitate degradation of  
836 ubiquitinated protein aggregates by autophagy. *J Biol Chem.* 282:24131-24145.
- 837 Reineke, L.C., N. Kedersha, M.A. Langereis, F.J. van Kuppeveld, and R.E. Lloyd. 2015. Stress  
838 granules regulate double-stranded RNA-dependent protein kinase activation through a  
839 complex containing G3BP1 and Caprin1. *MBio.* 6:e02486.
- 840 Reineke, L.C., W.C. Tsai, A. Jain, J.T. Kaelber, S.Y. Jung, and R.E. Lloyd. 2017. Casein Kinase 2 Is  
841 Linked to Stress Granule Dynamics through Phosphorylation of the Stress Granule  
842 Nucleating Protein G3BP1. *Mol Cell Biol.* 37.
- 843 Sahoo, P.K., S.J. Lee, P.B. Jaiswal, S. Alber, A.N. Kar, S. Miller-Randolph, E.E. Taylor, T. Smith, B.  
844 Singh, T.S. Ho, A. Urisman, S. Chand, E.A. Pena, A.L. Burlingame, C.J. Woolf, M.  
845 Fainzilber, A.W. English, and J.L. Twiss. 2018. Axonal G3BP1 stress granule protein limits  
846 axonal mRNA translation and nerve regeneration. *Nat Commun.* 9:3358.
- 847 Sahoo, P.K., P. Murawala, P.T. Sawale, M.R. Sahoo, M.M. Tripathi, S.R. Gaikwad, V. Seshadri, and  
848 J. Joseph. 2012. Wnt signalling antagonizes stress granule assembly through a  
849 Dishevelled-dependent mechanism. *Biol Open.* 1:109-119.
- 850 Schulte, T., L. Liu, M.D. Panas, B. Thaa, N. Dickson, B. Götte, A. Achour, and G.M. McInerney.  
851 2016. Combined structural, biochemical and cellular evidence demonstrates that both  
852 FGDF motifs in alphavirus nsP3 are required for efficient replication. *Open Biol.* 6.
- 853 Smith, C.A., and T. Kortemme. 2011. Predicting the tolerated sequences for proteins and protein  
854 interfaces using RosettaBackrub flexible backbone design. *PLoS One.* 6:e20451.
- 855 Solomon, S., Y. Xu, B. Wang, M.D. David, P. Schubert, D. Kennedy, and J.W. Schrader. 2007.  
856 Distinct Structural Features of Caprin-1 Mediate Its Interaction with G3BP-1 and Its  
857 Induction of Phosphorylation of Eukaryotic Translation Initiation Factor 2, Entry to  
858 Cytoplasmic Stress Granules, and Selective Interaction with a Subset of mRNAs.  
859 *Molecular and Cellular Biology.* 27:2324-2342.
- 860 Szaflarski, W., M.M. Fay, N. Kedersha, M. Zabel, P. Anderson, and P. Ivanov. 2016. Vinca alkaloid  
861 drugs promote stress-induced translational repression and stress granule formation.  
862 *Oncotarget.*

- 863 Tompa, P. 2005. The interplay between structure and function in intrinsically unstructured  
864 proteins. *FEBS Lett.* 579:3346-3354.
- 865 Tourriere, H., K. Chebli, L. Zekri, B. Courselaud, J.M. Blanchard, E. Bertrand, and J. Tazi. 2003. The  
866 RasGAP-associated endoribonuclease G3BP assembles stress granules. *J Cell Biol.*  
867 160:823-831.
- 868 Tsumuraya, T., C. Ishikawa, Y. Machijima, S. Nakachi, M. Senba, J. Tanaka, and N. Mori. 2011.  
869 Effects of hippuristanol, an inhibitor of eIF4A, on adult T-cell leukemia. *Biochem*  
870 *Pharmacol.* 81:713-722.
- 871 Uversky, V.N. 2017. Intrinsically disordered proteins in overcrowded milieu: Membrane-less  
872 organelles, phase separation, and intrinsic disorder. *Curr Opin Struct Biol.* 44:18-30.
- 873 Weber, S.C., and C.P. Brangwynne. 2012. Getting RNA and protein in phase. *Cell.* 149:1188-1191.
- 874 Youn, J.Y., W.H. Dunham, S.J. Hong, J.D.R. Knight, M. Bashkurov, G.I. Chen, H. Bagci, B. Rathod,  
875 G. MacLeod, S.W.M. Eng, S. Angers, Q. Morris, M. Fabian, J.F. Côté, and A.C. Gingras.  
876 2018. High-Density Proximity Mapping Reveals the Subcellular Organization of mRNA-  
877 Associated Granules and Bodies. *Mol Cell.* 69:517-532.e511.
- 878

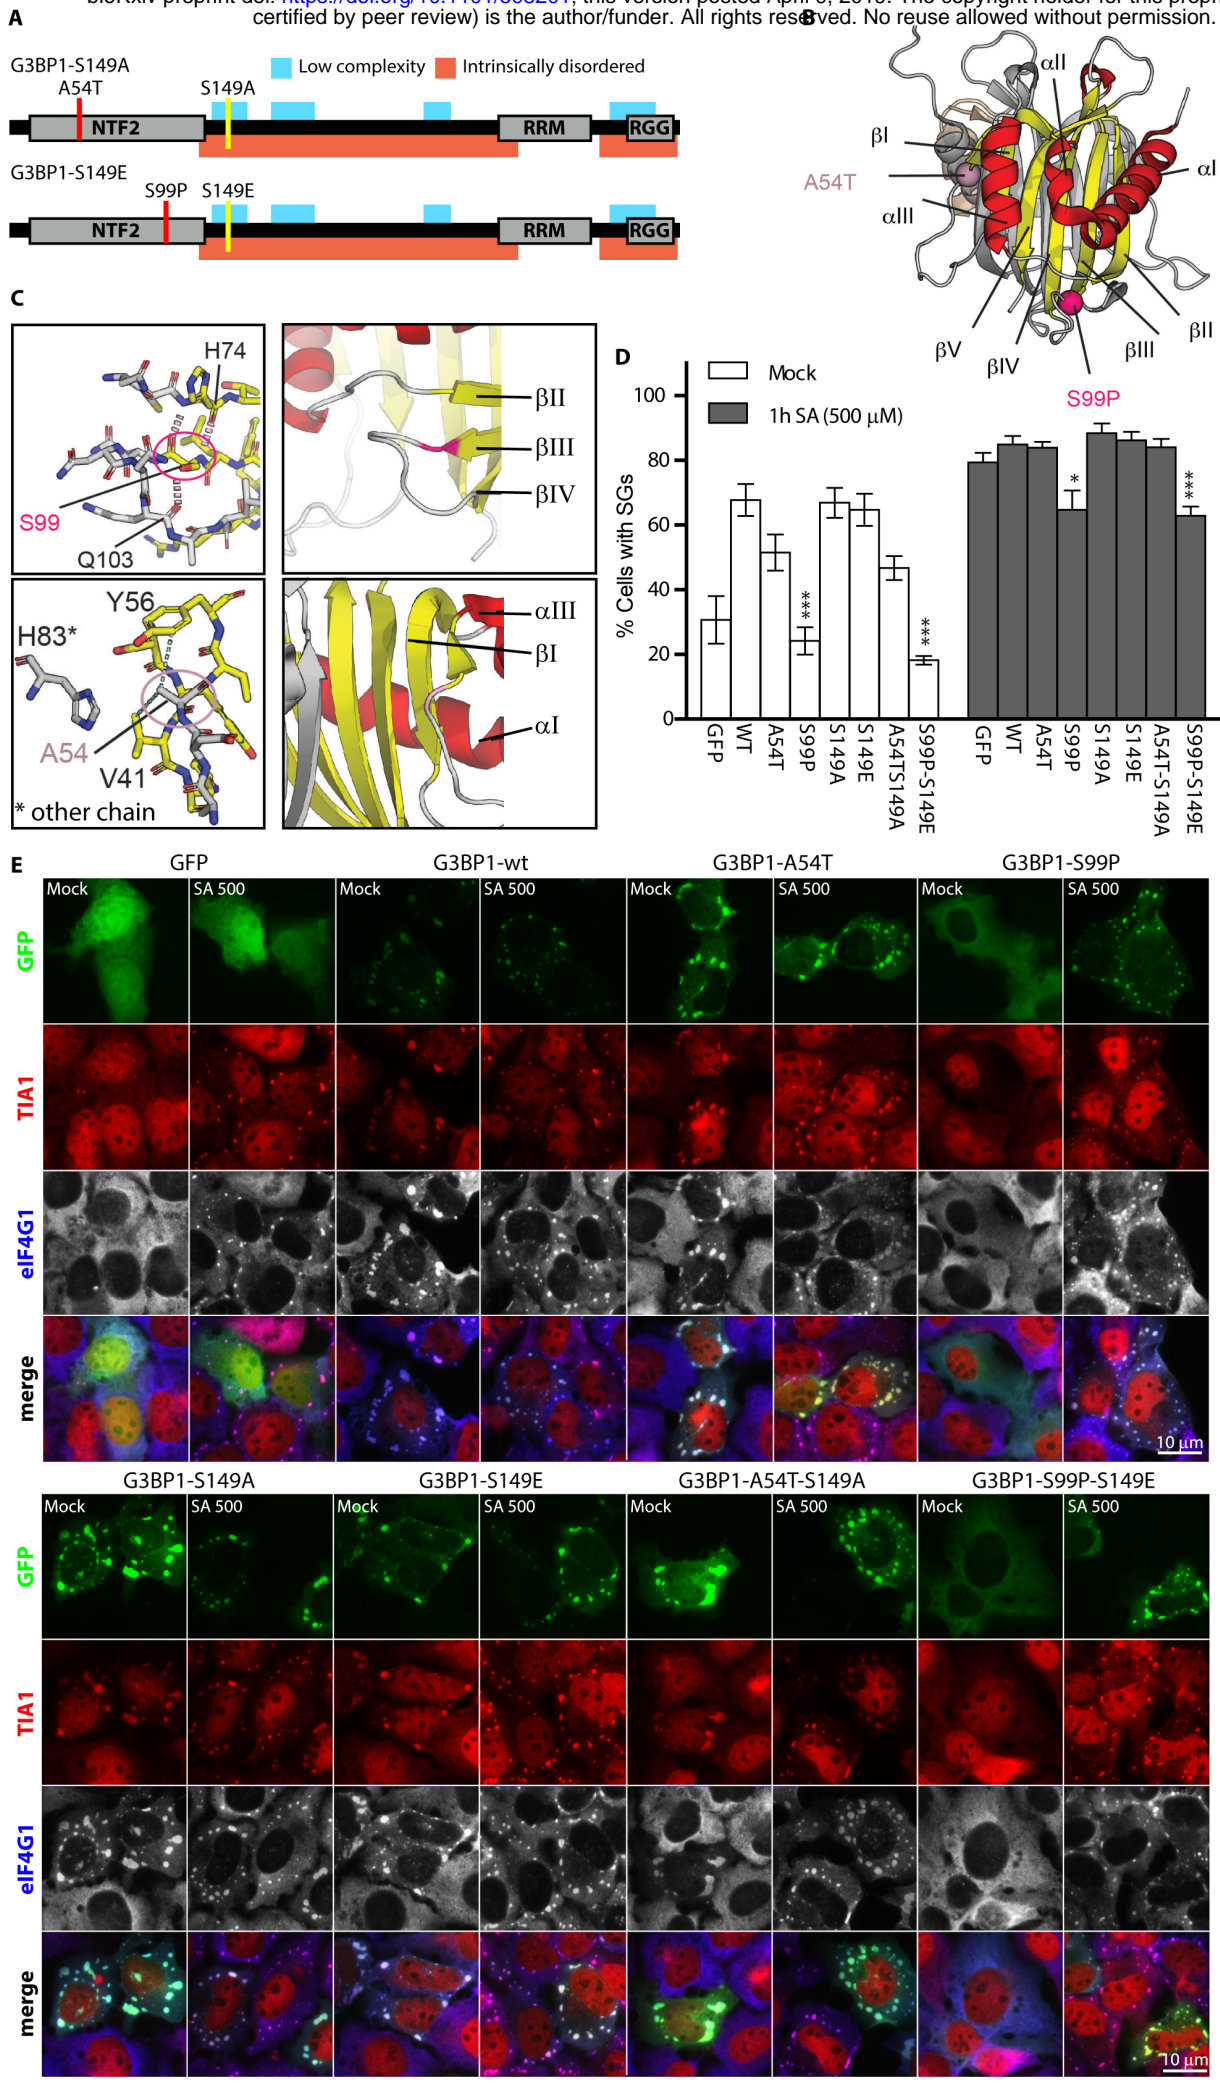



**Figure 2**

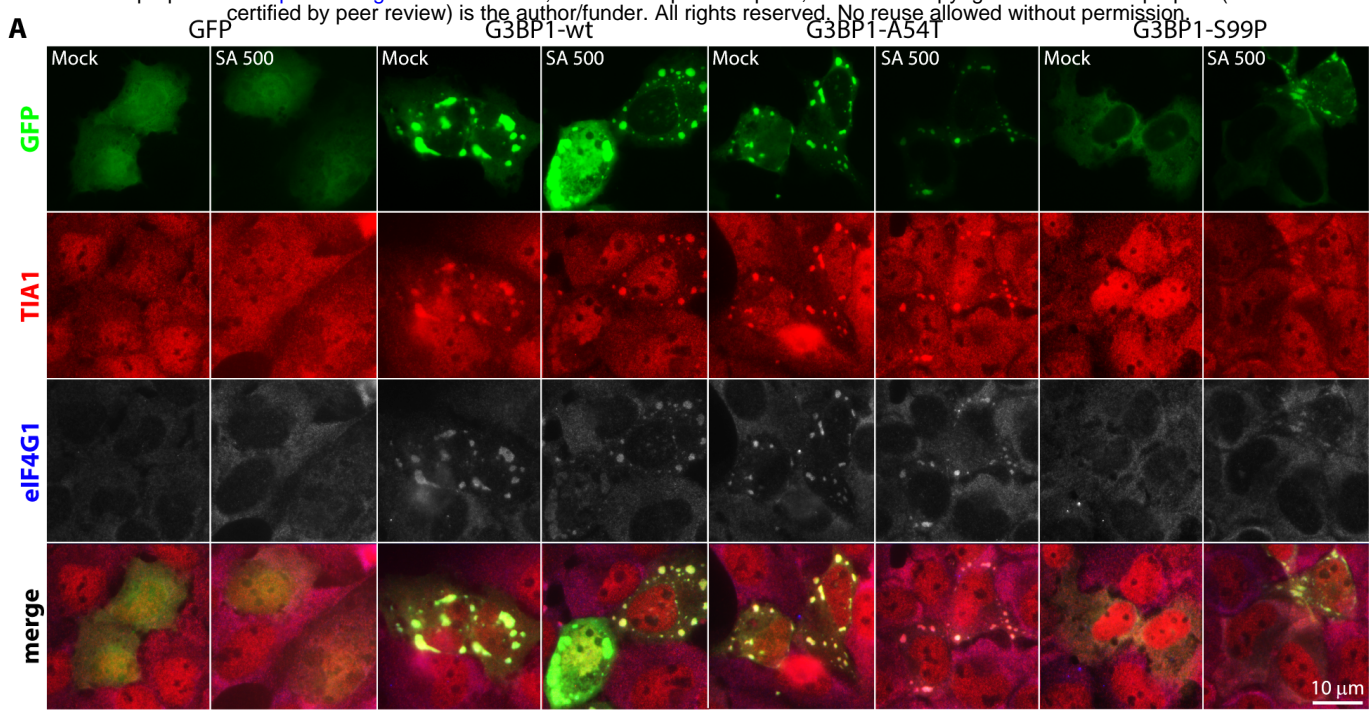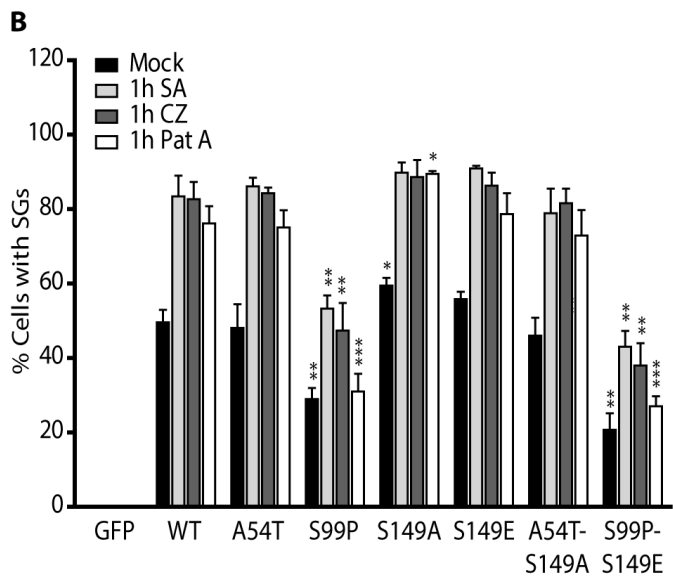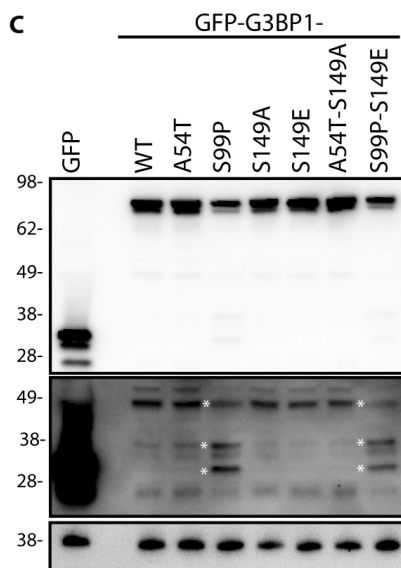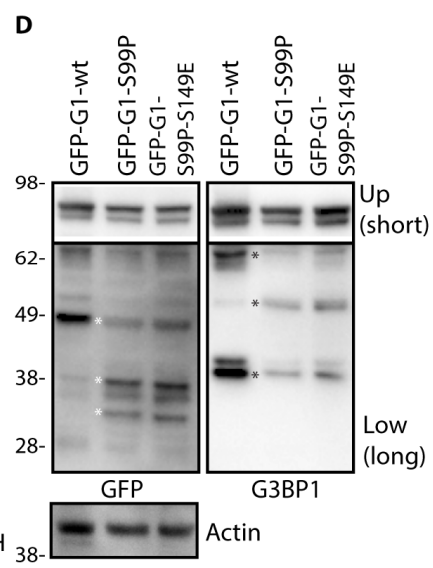

Figure 3

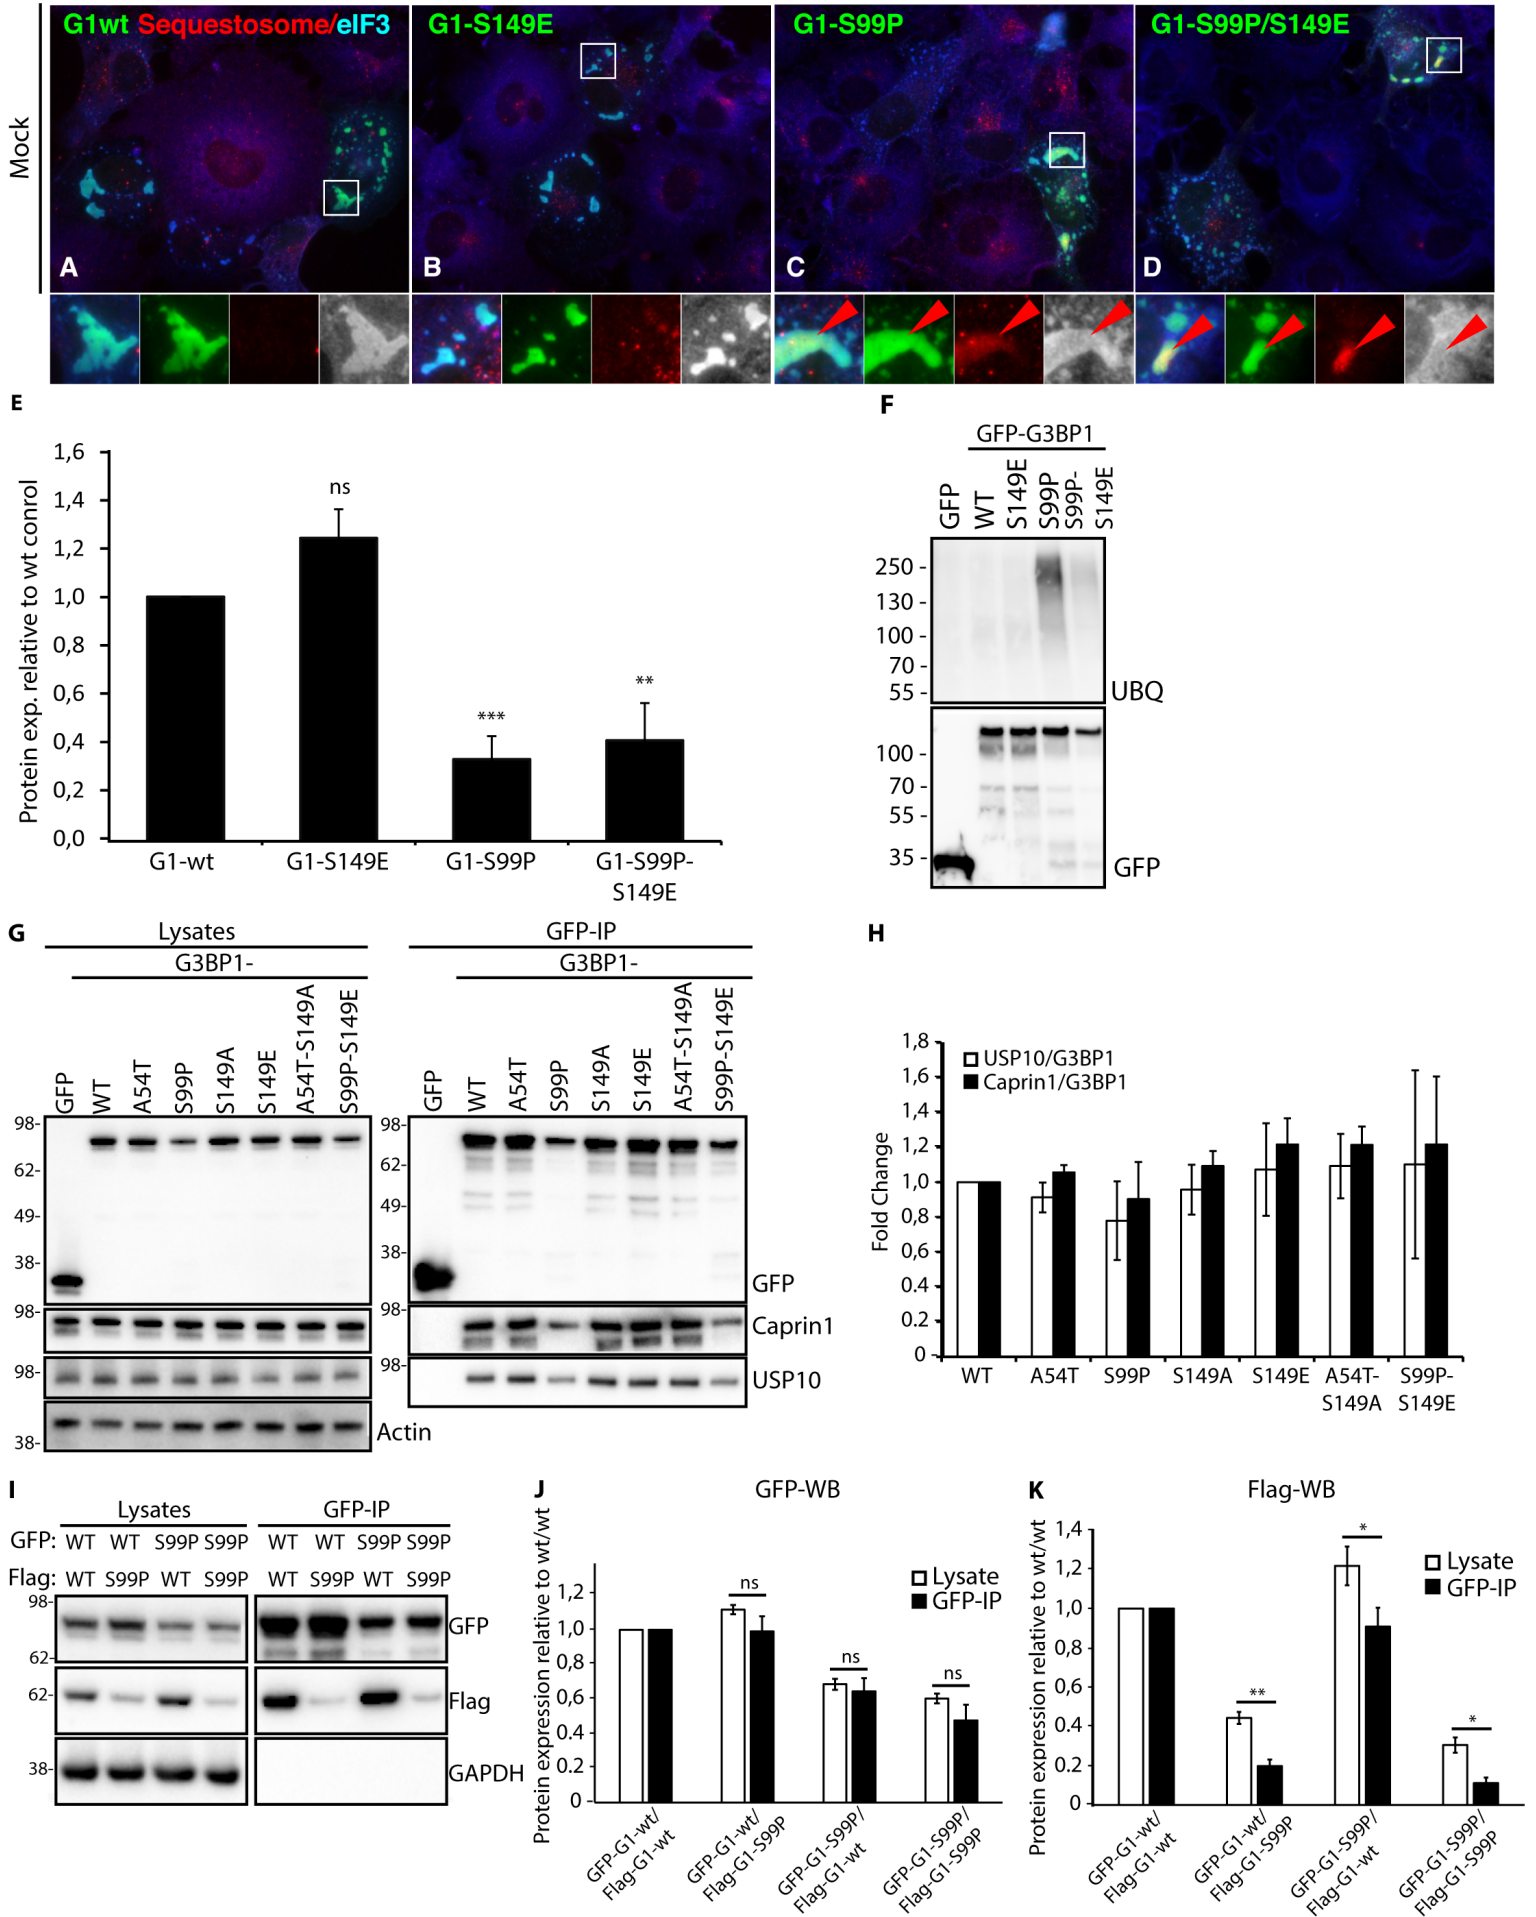

Figure 4

**A**

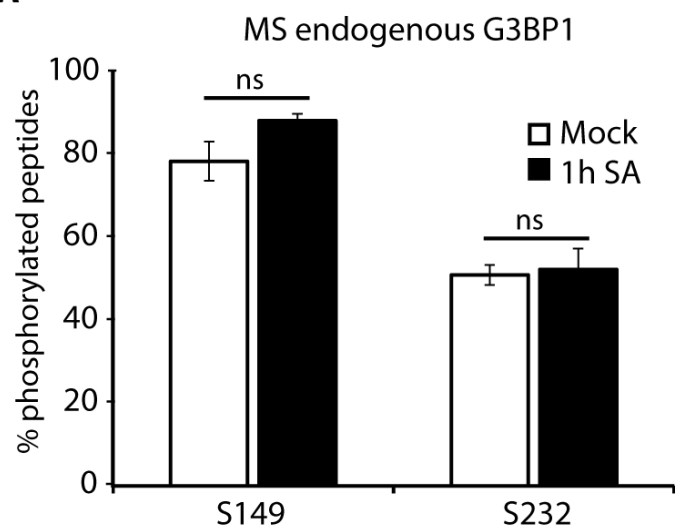

**B**

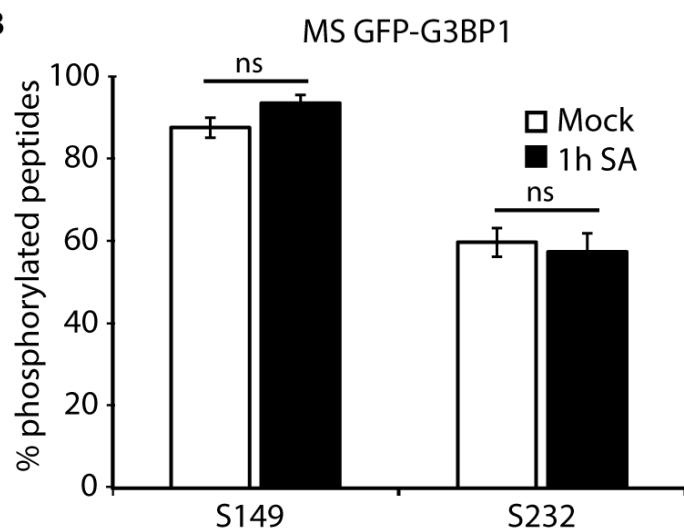



Figure S1

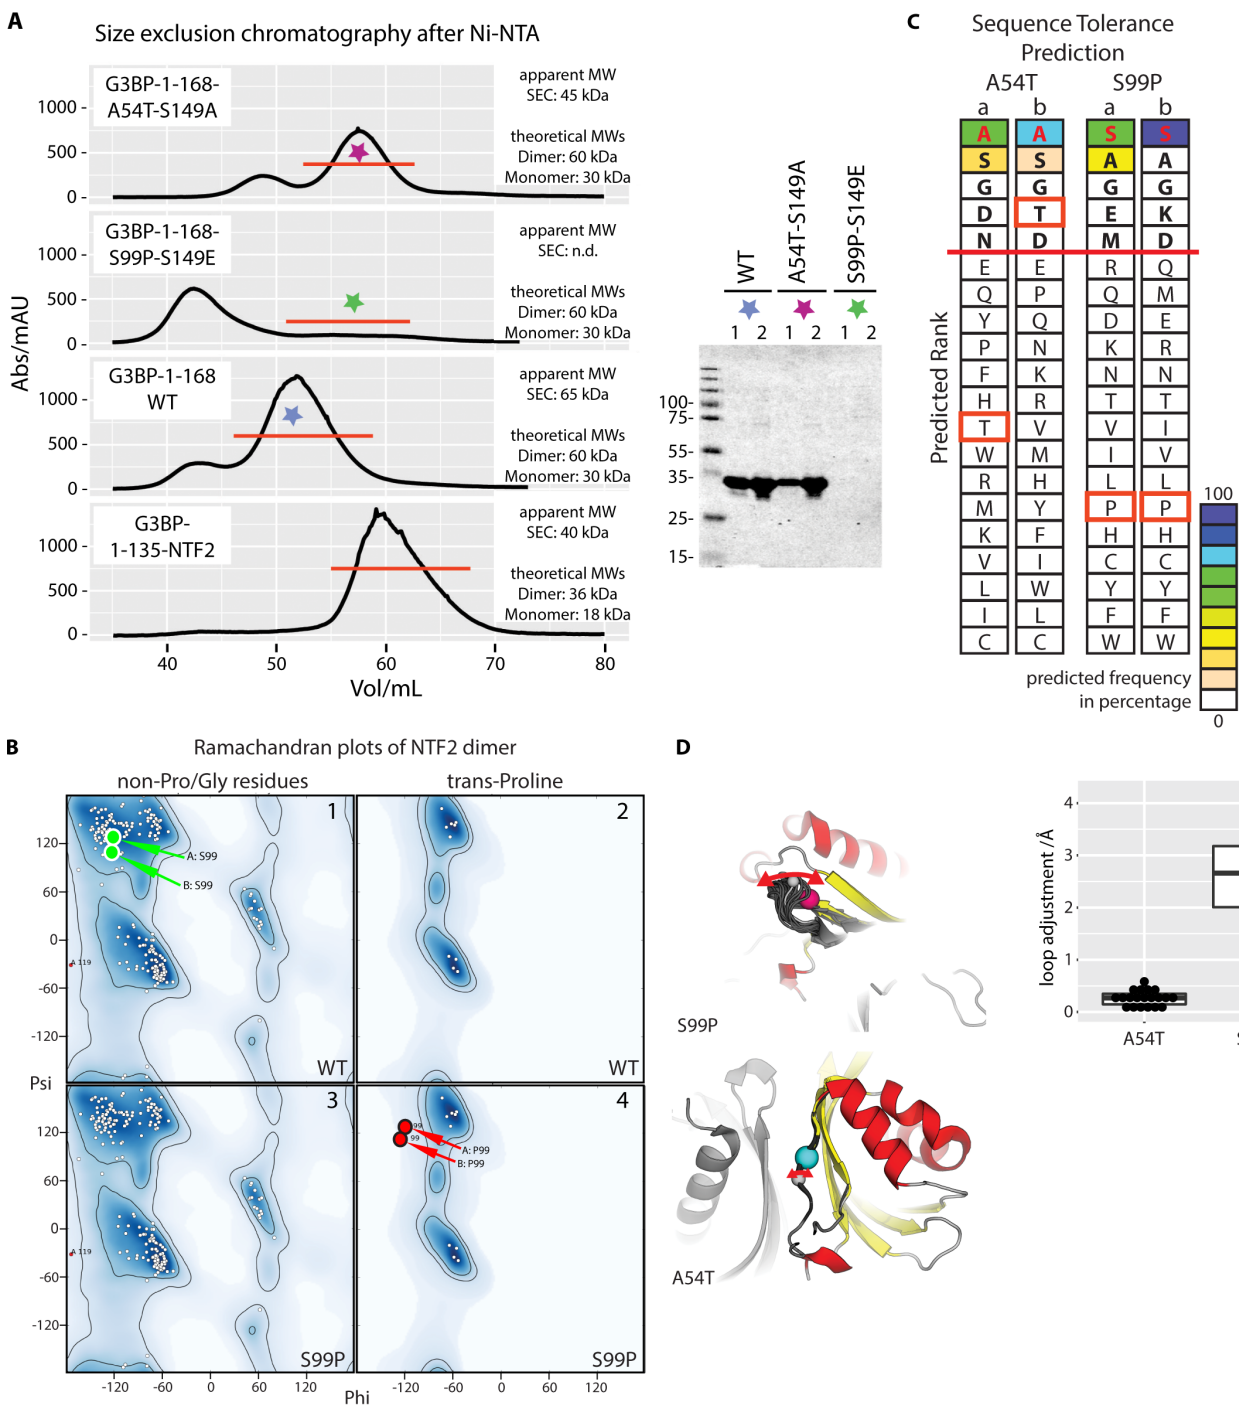

Figure S2

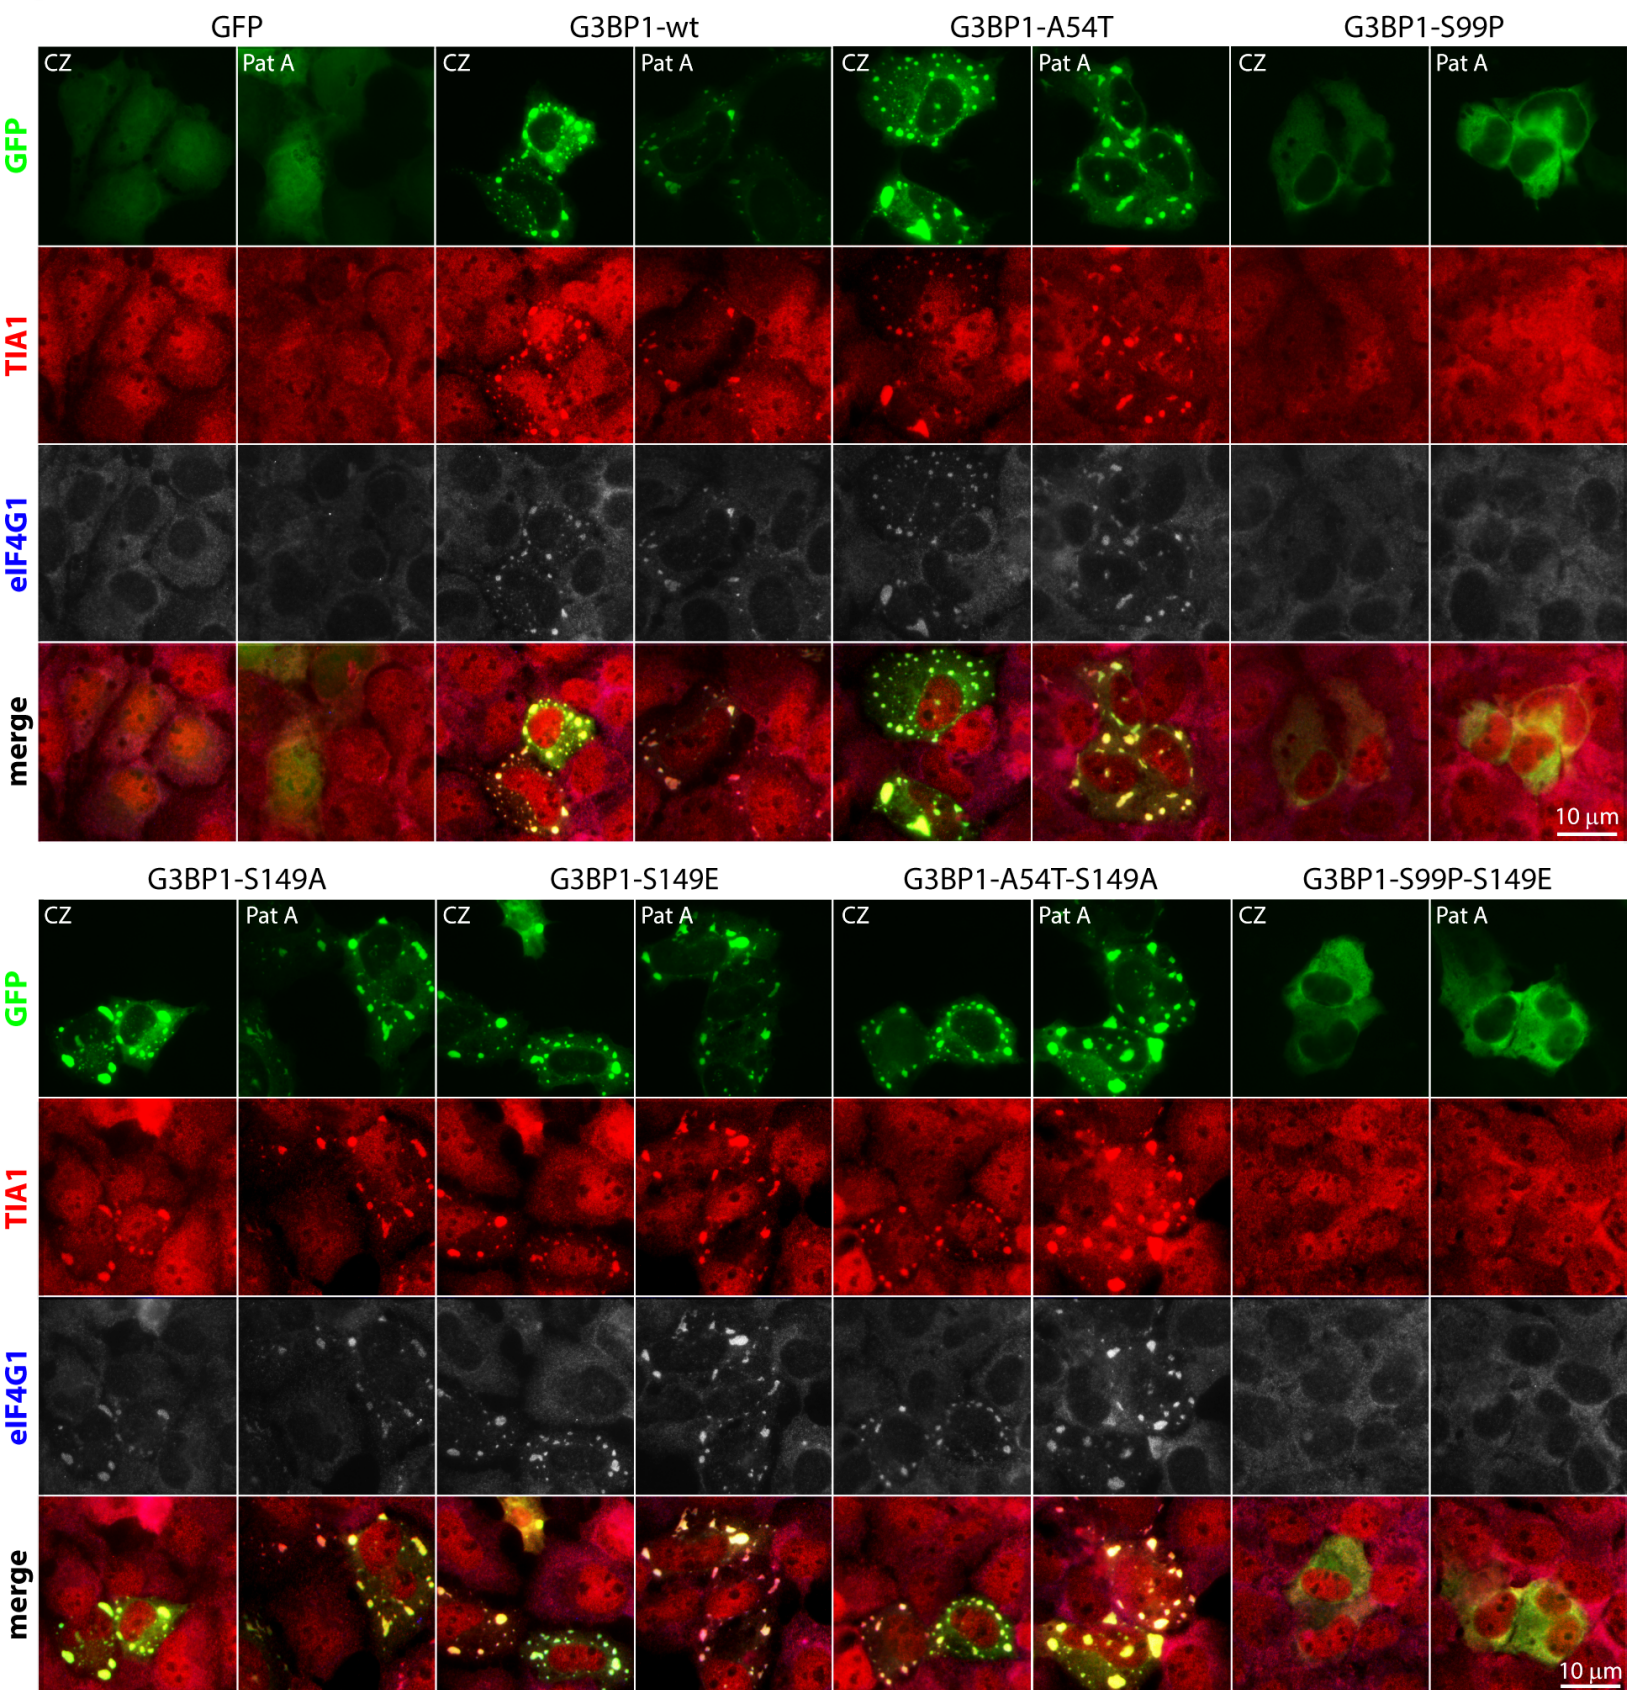



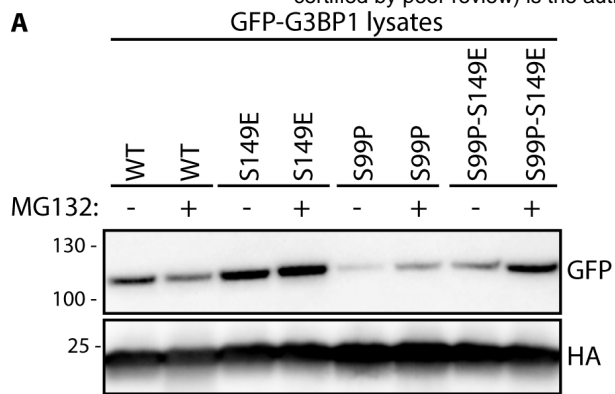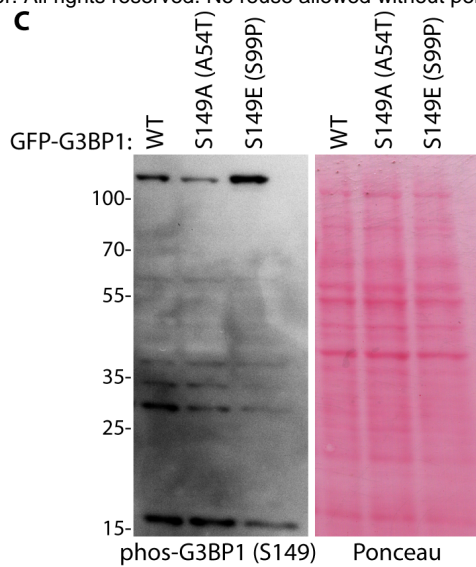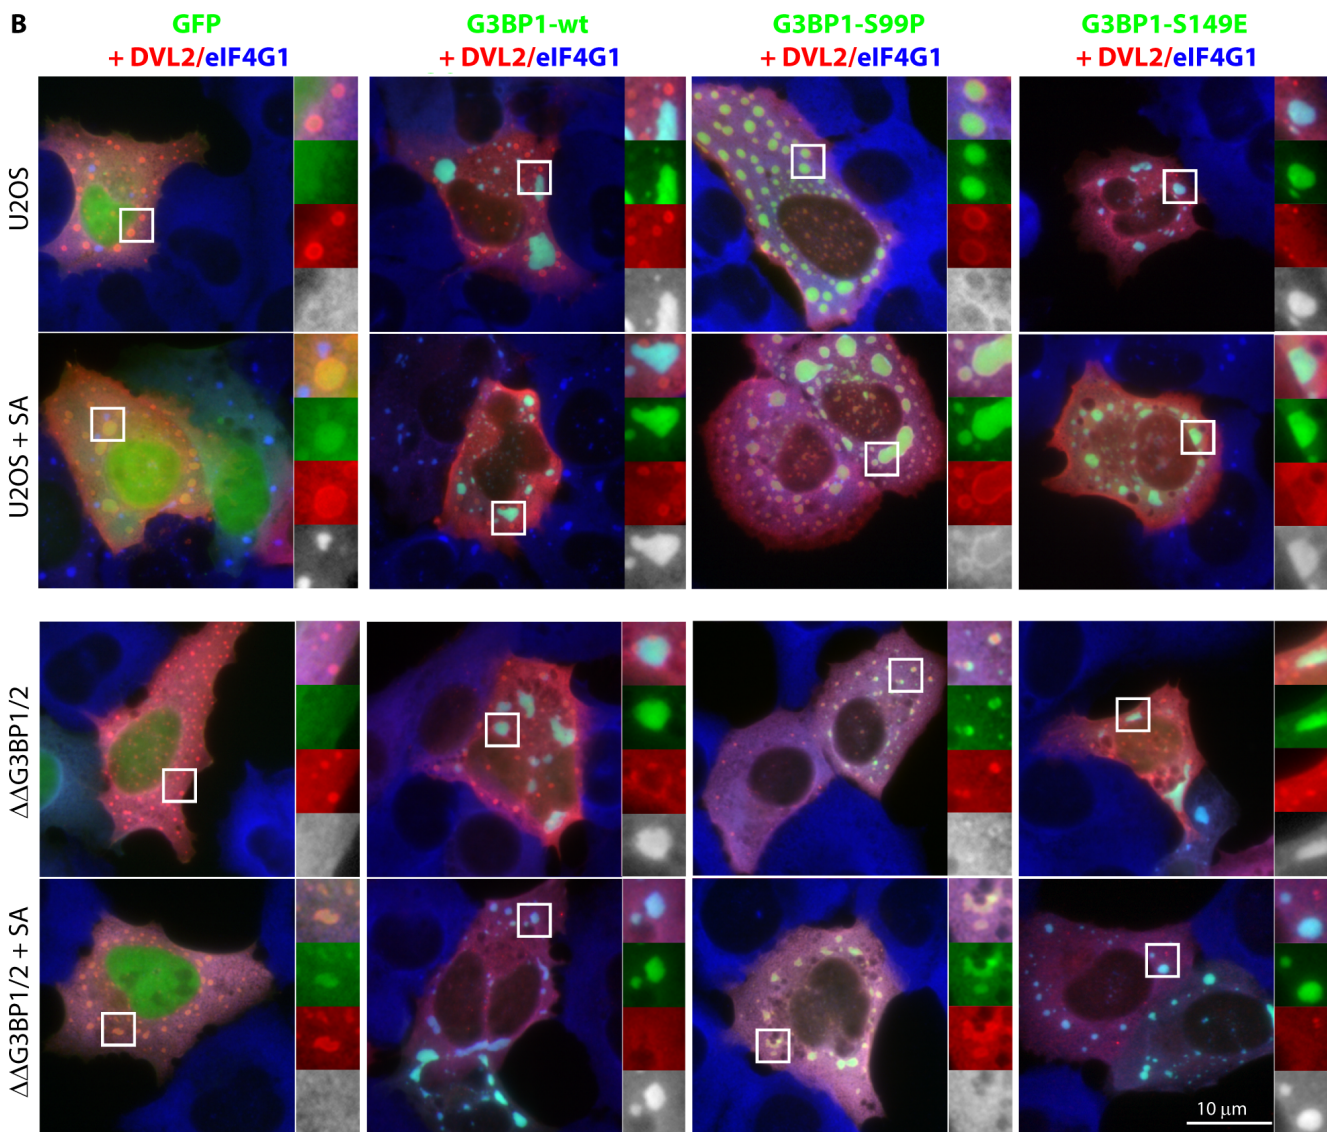

Source: https://www.biorxiv.org/content/10.1101/598201v1.full.pdf
